# Supplementary material
Source: HighWire-hosted journal article supplement (https://jitc.bmj.com/content/10/7/e004159)
Supplement: inline-supplementary-material-2 [file inline-supplementary-material-2.xlsx]

## Sheet: Sheet1
Supplementary Data 2. pMHCs from SILAC-labeled B16F10 wt cells + DCs in cross presentation study.
Endogenous DC.peptides					SILAC-labeled crpss presented DC peptides					SILAC-labeled B16F10 wt peptides
Sequence	Master Protein Descriptions	Gene			Sequence	Master Protein Descriptions	Gene			Sequence	Master Protein Descriptions	Gene
AAAEISMGTEV	Nucleolar protein 58 OS=Mus musculus OX=10090 GN=Nop58 PE=1 SV=1	NOP58			AAGAVAQLP	Tubby-related protein 4 OS=Mus musculus OX=10090 GN=Tulp4 PE=1 SV=1	TULP4			AAIREQVR	Membrane-bound transcription factor site-2 protease OS=Mus musculus OX=10090 GN=Mbtps2 PE=2 SV=1	MBTPS2
AAAQGEGKAGG	Transcription factor Sp6 OS=Mus musculus OX=10090 GN=Sp6 PE=2 SV=2	SP6			AAPADNSEL	Oxysterol-binding protein 2 OS=Mus musculus OX=10090 GN=Osbp2 PE=1 SV=1	OSBP2			ASVIRVMN	Splicing factor 3B subunit 3 OS=Mus musculus OX=10090 GN=Sf3b3 PE=1 SV=1	SF3B3
AAAYVGDVP	Serine/threonine-protein phosphatase 6 regulatory ankyrin repeat subunit C OS=Mus musculus OX=10090 GN=Ankrd52 PE=1 SV=1	ANKRD52			AEGIHTGQFVY	60S ribosomal protein L8 OS=Mus musculus OX=10090 GN=Rpl8 PE=1 SV=2	RPL8			ATIISFMQ	cGMP-specific 3',5'-cyclic phosphodiesterase OS=Mus musculus OX=10090 GN=Pde5a PE=1 SV=2	PDE5A
AAGAGKVTK	Elongation factor 1-alpha 1 OS=Mus musculus OX=10090 GN=Eef1a1 PE=1 SV=3	EEF1A1			AEKKTMTN	(blank)	?			AVVMEKSV	Transmembrane protein KIAA1109 OS=Mus musculus OX=10090 GN=Kiaa1109 PE=1 SV=4	KIAA1109
AAVTPGKK	Nucleolin OS=Mus musculus OX=10090 GN=Ncl PE=1 SV=2	NCL			AGFAGDDAPR	Actin, cytoplasmic 1 OS=Mus musculus OX=10090 GN=Actb PE=1 SV=1;Actin, aortic smooth muscle OS=Mus musculus OX=10090 GN=Acta2 PE=1 SV=1	ACTB			DFQIESIV	Mitogen-activated protein kinase kinase kinase kinase 3 OS=Mus musculus OX=10090 GN=Map4k3 PE=1 SV=4	MAP4K3
ADLSSKAL	DNA polymerase lambda OS=Mus musculus OX=10090 GN=Poll PE=2 SV=1	POLL			AGLQFPVGR	Histone H2A type 1-B OS=Mus musculus OX=10090 GN=H2ac4 PE=1 SV=1	H2AC4			DRVTNGYQ	Desmoglein-1-alpha OS=Mus musculus OX=10090 GN=Dsg1a PE=2 SV=2	DSG1A
AFAVLLGLGLG	Tumor necrosis factor receptor superfamily member 4 OS=Mus musculus OX=10090 GN=Tnfrsf4 PE=1 SV=1	TNFRSF4			AIRVTNPNAR	60S ribosomal protein L32 OS=Mus musculus OX=10090 GN=Rpl32 PE=1 SV=2	RPL32			DVKFGADA	60 kDa heat shock protein, mitochondrial OS=Mus musculus OX=10090 GN=Hspd1 PE=1 SV=1	HSPD1
AFAVLLGLGLGL	Tumor necrosis factor receptor superfamily member 4 OS=Mus musculus OX=10090 GN=Tnfrsf4 PE=1 SV=1	TNFRSF4			ALRDNSTMGY	Heat shock protein HSP 90-beta OS=Mus musculus OX=10090 GN=Hsp90ab1 PE=1 SV=3	HSP90AB1			DVQDSFNG	Ankyrin repeat domain-containing protein 22 OS=Mus musculus OX=10090 GN=Ankrd22 PE=2 SV=1	ANKRD22
AFGRLVGESM	Chloride channel protein 2 OS=Mus musculus OX=10090 GN=Clcn2 PE=1 SV=2	CLCN2			APNNLGGGP	Syntaxin-5 OS=Mus musculus OX=10090 GN=Stx5 PE=1 SV=3	STX5			EEVKITTI	Titin OS=Mus musculus OX=10090 GN=Ttn PE=1 SV=1	TTN
AFIKAGLG	Double-stranded RNA-specific editase 1 OS=Mus musculus OX=10090 GN=Adarb1 PE=1 SV=1	ADARB1			AQALRDNSTMGY	Heat shock protein HSP 90-beta OS=Mus musculus OX=10090 GN=Hsp90ab1 PE=1 SV=3	HSP90AB1			ELQKVQEL	Myosin-14 OS=Mus musculus OX=10090 GN=Myh14 PE=1 SV=1	MYH14
AGLQFPVGR	Histone H2A type 1-B OS=Mus musculus OX=10090 GN=H2ac4 PE=1 SV=1	H2AC4			ASVLNVNHI	Ankyrin repeat domain-containing protein 17 OS=Mus musculus OX=10090 GN=Ankrd17 PE=1 SV=2	ANKRD17			ERALSEQI	Cytoplasmic dynein 1 intermediate chain 2 OS=Mus musculus OX=10090 GN=Dync1i2 PE=1 SV=1	DYNC1I2
AGYTSFQIT	Dynein heavy chain 5, axonemal OS=Mus musculus OX=10090 GN=Dnah5 PE=1 SV=2	DNAH5			ATNGLKTIT	Tyrosine-protein kinase transmembrane receptor ROR2 OS=Mus musculus OX=10090 GN=Ror2 PE=1 SV=2	ROR2			ESFQLSIT	Transmembrane and immunoglobulin domain-containing protein 1 OS=Mus musculus OX=10090 GN=Tmigd1 PE=2 SV=1	TMIGD1
AIGGQAVSN	Kelch-like protein 42 OS=Mus musculus OX=10090 GN=Klhl42 PE=2 SV=1	KLHL42			AVSRMEQDEY	Trifunctional enzyme subunit beta, mitochondrial OS=Mus musculus OX=10090 GN=Hadhb PE=1 SV=1	HADHB			ESTVFIPQ	FRAS1-related extracellular matrix protein 2 OS=Mus musculus OX=10090 GN=Frem2 PE=1 SV=2	FREM2
ALAKGTTH	Otoconin-90 OS=Mus musculus OX=10090 GN=Oc90 PE=1 SV=2	OC90			DFNSNSHSSTF	Glyceraldehyde-3-phosphate dehydrogenase OS=Mus musculus OX=10090 GN=Gapdh PE=1 SV=2	GAPDH			EVEGTSYH	Serine-protein kinase ATM OS=Mus musculus OX=10090 GN=Atm PE=1 SV=2	ATM
ALEEQLQQIR	Keratin, type I cytoskeletal 10 OS=Mus musculus OX=10090 GN=Krt10 PE=1 SV=3	KRT10			DGQVINETSQH	Vimentin OS=Mus musculus OX=10090 GN=Vim PE=1 SV=3	VIM			EVMRGEQV	Basal cell adhesion molecule OS=Mus musculus OX=10090 GN=Bcam PE=1 SV=1	BCAM
ALEEQLQQIRAE	Keratin, type I cytoskeletal 10 OS=Mus musculus OX=10090 GN=Krt10 PE=1 SV=3	KRT10			DVAVLRCLLQ	Protein unc-80 homolog OS=Mus musculus OX=10090 GN=Unc80 PE=1 SV=2	UNC80			EVSVTWMP	Macrophage colony-stimulating factor 1 receptor OS=Mus musculus OX=10090 GN=Csf1r PE=1 SV=3	CSF1R
ANVAIERLADA	ATP-binding cassette sub-family A member 8-A OS=Mus musculus OX=10090 GN=Abca8a PE=1 SV=2	ABCA8A			DVKAPAMF	40S ribosomal protein S3a OS=Mus musculus OX=10090 GN=Rps3a PE=1 SV=3	RPS3A			EVVQAVKQ	1-phosphatidylinositol 4,5-bisphosphate phosphodiesterase beta-2 OS=Mus musculus OX=10090 GN=Plcb2 PE=1 SV=1	PLCB2
APIIAVTR	Pyruvate kinase PKM OS=Mus musculus OX=10090 GN=Pkm PE=1 SV=4	PKM			DVNAAIATIK	Tubulin alpha-1B chain OS=Mus musculus OX=10090 GN=Tuba1b PE=1 SV=2	TUBA1B			FNNEQETI	Chloride channel protein ClC-Kb OS=Mus musculus OX=10090 GN=Clcnkb PE=1 SV=2	CLCNKB
APVISAEK	Tubulin alpha-1B chain OS=Mus musculus OX=10090 GN=Tuba1b PE=1 SV=2;Tubulin alpha-4A chain OS=Mus musculus OX=10090 GN=Tuba4a PE=1 SV=1	TUBA1B			ELREEEEL	Protein bassoon OS=Mus musculus OX=10090 GN=Bsn PE=1 SV=4;Protein piccolo OS=Mus musculus OX=10090 GN=Pclo PE=1 SV=4	BSN			GFYGEFII	Zinc finger protein 496 OS=Mus musculus OX=10090 GN=Znf496 PE=1 SV=1	ZNF496
APVLAAPAV	Uncharacterized protein KIAA1522 OS=Mus musculus OX=10090 GN=Kiaa1522 PE=1 SV=1	KIAA1522			ETATLRSGY	Endoplasmin OS=Mus musculus OX=10090 GN=Hsp90b1 PE=1 SV=2	HSP90B1			GGRNIISA	Protein PRRC2B OS=Mus musculus OX=10090 GN=Prrc2b PE=1 SV=1	PRRC2B
AQQRALPQ	Mediator of RNA polymerase II transcription subunit 22 OS=Mus musculus OX=10090 GN=Med22 PE=1 SV=2	MED22			FAAAQIGNSF	Glycine--tRNA ligase OS=Mus musculus OX=10090 GN=Gars1 PE=1 SV=1	GARS1			GTLMKVVE	Nuclear autoantigenic sperm protein OS=Mus musculus OX=10090 GN=Nasp PE=1 SV=2	NASP
AQYEDIAQK	Keratin, type II cytoskeletal 2 oral OS=Mus musculus OX=10090 GN=Krt76 PE=1 SV=1	KRT76			FAFGGLVMP	POM121-like protein 2 OS=Mus musculus OX=10090 GN=Pom121l2 PE=3 SV=1	POM121L2			HAPERFAG	E3 ubiquitin-protein ligase Midline-1 OS=Mus musculus OX=10090 GN=Mid1 PE=1 SV=2	MID1
AQYEDIAQKS	Keratin, type II cytoskeletal 2 oral OS=Mus musculus OX=10090 GN=Krt76 PE=1 SV=1	KRT76			FAPVNVTTEVK	Elongation factor 1-alpha 1 OS=Mus musculus OX=10090 GN=Eef1a1 PE=1 SV=3	EEF1A1			HGRLCFML	ATP-sensitive inward rectifier potassium channel 11 OS=Mus musculus OX=10090 GN=Kcnj11 PE=1 SV=1	KCNJ11
AQYELENALG	Protein disulfide-isomerase A6 OS=Mus musculus OX=10090 GN=Pdia6 PE=1 SV=3	PDIA6			FFVDDFDNL	Vitrin OS=Mus musculus OX=10090 GN=Vit PE=1 SV=2	VIT			HMSIDKTT	Centlein OS=Mus musculus OX=10090 GN=Cntln PE=1 SV=1	CNTLN
ARMAEPSF	Erythropoietin receptor OS=Mus musculus OX=10090 GN=Epor PE=1 SV=1	EPOR			FGGSGTSSRP	Vimentin OS=Mus musculus OX=10090 GN=Vim PE=1 SV=3	VIM			HPTQPSHI	WD repeat-containing protein 34 OS=Mus musculus OX=10090 GN=Wdr34 PE=1 SV=2	WDR34
ASATPITGP	Tyrosine-protein phosphatase non-receptor type 21 OS=Mus musculus OX=10090 GN=Ptpn21 PE=1 SV=1	PTPN21			FGGSGTSSRPSS	Vimentin OS=Mus musculus OX=10090 GN=Vim PE=1 SV=3	VIM			IEIARAAT	Baculoviral IAP repeat-containing protein 1e OS=Mus musculus OX=10090 GN=Naip5 PE=1 SV=3	NAIP5
ASDFTCAST	Homeobox even-skipped homolog protein 1 OS=Mus musculus OX=10090 GN=Evx1 PE=2 SV=1	EVX1			FGPPAVEGPPS	Angiomotin-like protein 2 OS=Mus musculus OX=10090 GN=Amotl2 PE=1 SV=1	AMOTL2			ISMASKIT	Transcriptional repressor NF-X1 OS=Mus musculus OX=10090 GN=Nfx1 PE=1 SV=1	NFX1
ASGLLQPL	Potassium voltage-gated channel subfamily H member 3 OS=Mus musculus OX=10090 GN=Kcnh3 PE=2 SV=3	KCNH3			FIDTTSKF	60S ribosomal protein L3 OS=Mus musculus OX=10090 GN=Rpl3 PE=1 SV=3	RPL3			ISPSERLT	2,4-dienoyl-CoA reductase, mitochondrial OS=Mus musculus OX=10090 GN=Decr1 PE=1 SV=1	DECR1
ASILAYMFN	Exportin-1 OS=Mus musculus OX=10090 GN=Xpo1 PE=1 SV=1	XPO1			FTDEESRVF	Bcl-2-associated transcription factor 1 OS=Mus musculus OX=10090 GN=Bclaf1 PE=1 SV=2	BCLAF1			ITIIEIIE	Acid-sensing ion channel 5 OS=Mus musculus OX=10090 GN=Asic5 PE=2 SV=1	ASIC5
AVGSGSRGL	MAP/microtubule affinity-regulating kinase 4 OS=Mus musculus OX=10090 GN=Mark4 PE=1 SV=1	MARK4			GASVLVRYFM	Agrin OS=Mus musculus OX=10090 GN=Agrn PE=1 SV=1	AGRN			ITQTLSDM	Dynein heavy chain 1, axonemal OS=Mus musculus OX=10090 GN=Dnah1 PE=1 SV=1	DNAH1
AVTVAPPGAR	Heterogeneous nuclear ribonucleoprotein U OS=Mus musculus OX=10090 GN=Hnrnpu PE=1 SV=1	HNRNPU			GDRYDGMVGF	Heterogeneous nuclear ribonucleoprotein K OS=Mus musculus OX=10090 GN=Hnrnpk PE=1 SV=1	HNRNPK			IVMGYTSV	Aldehyde oxidase 1 OS=Mus musculus OX=10090 GN=Aox1 PE=1 SV=2	AOX1
DELGKFSSTL	Pecanex-like protein 1 OS=Mus musculus OX=10090 GN=Pcnx1 PE=1 SV=3	PCNX1			GEPLQAAAS	40-kDa huntingtin-associated protein OS=Mus musculus OX=10090 GN=F8a1 PE=1 SV=1	F8A1			KAIAYWMT	Teneurin-1 OS=Mus musculus OX=10090 GN=Tenm1 PE=1 SV=1	TENM1
DLGERMEV	Contactin-associated protein-like 4 OS=Mus musculus OX=10090 GN=Cntnap4 PE=1 SV=2	CNTNAP4			GFYCRNVQ	Cysteine protease ATG4C OS=Mus musculus OX=10090 GN=Atg4c PE=1 SV=2	ATG4C			KAPQYHEI	Sodium bicarbonate cotransporter 3 OS=Mus musculus OX=10090 GN=Slc4a7 PE=1 SV=2	SLC4A7
DLPAPIER	Ig gamma-2A chain C region, membrane-bound form OS=Mus musculus OX=10090 GN=Igh-1a PE=1 SV=3	IGH-1A			GGIQNVGHI	Inosine-5'-monophosphate dehydrogenase 2 OS=Mus musculus OX=10090 GN=Impdh2 PE=1 SV=2	IMPDH2			KDAIDQKI	BCLAF1 and THRAP3 family member 3 OS=Mus musculus OX=10090 GN=Bclaf3 PE=1 SV=1	BCLAF3
DQGRGSGPG	MAP7 domain-containing protein 1 OS=Mus musculus OX=10090 GN=Map7d1 PE=1 SV=1	MAP7D1			GGSGGSGGYGGR	Heterogeneous nuclear ribonucleoproteins A2/B1 OS=Mus musculus OX=10090 GN=Hnrnpa2b1 PE=1 SV=2	HNRNPA2B1			KDELLPVM	Zinc finger protein PLAG1 OS=Mus musculus OX=10090 GN=Plag1 PE=2 SV=2	PLAG1
DSQAQLADDILN	Regulator of G-protein signaling 12 OS=Mus musculus OX=10090 GN=Rgs12 PE=1 SV=2	RGS12			GGYFLAGRSM	Sodium/glucose cotransporter 2 OS=Mus musculus OX=10090 GN=Slc5a2 PE=1 SV=1	SLC5A2			KEANQQIE	Mixed lineage kinase domain-like protein OS=Mus musculus OX=10090 GN=Mlkl PE=1 SV=1	MLKL
DVQIFNSSS	Mucin-19 OS=Mus musculus OX=10090 GN=Muc19 PE=2 SV=2	MUC19			GINKIGGMEGP	Heterogeneous nuclear ribonucleoprotein M OS=Mus musculus OX=10090 GN=Hnrnpm PE=1 SV=3	HNRNPM			KEKENEII	Tudor domain-containing protein 6 OS=Mus musculus OX=10090 GN=Tdrd6 PE=1 SV=1	TDRD6
DVQLQESG	Ig heavy chain V region MOPC 315 OS=Mus musculus OX=10090 PE=1 SV=2	?			GISPRGAGY	Serine/threonine-protein phosphatase 2A catalytic subunit alpha isoform OS=Mus musculus OX=10090 GN=Ppp2ca PE=1 SV=1	PPP2CA			KEKERIAV	Golgin subfamily A member 3 OS=Mus musculus OX=10090 GN=Golga3 PE=1 SV=3	GOLGA3
EAFVSLGTV	Ankyrin and armadillo repeat-containing protein OS=Mus musculus OX=10090 GN=Ankar PE=2 SV=1	ANKAR			GMTPSKGVLF	Transitional endoplasmic reticulum ATPase OS=Mus musculus OX=10090 GN=Vcp PE=1 SV=4	VCP			KFSVEEII	Latexin OS=Mus musculus OX=10090 GN=Lxn PE=1 SV=2	LXN
EEQLQQIR	Keratin, type I cytoskeletal 10 OS=Mus musculus OX=10090 GN=Krt10 PE=1 SV=3	KRT10			GNFGFGDSR	Heterogeneous nuclear ribonucleoproteins A2/B1 OS=Mus musculus OX=10090 GN=Hnrnpa2b1 PE=1 SV=2	HNRNPA2B1			KGAYNVAV	Zinc finger SWIM domain-containing protein 8 OS=Mus musculus OX=10090 GN=Zswim8 PE=1 SV=1	ZSWIM8
EEQLQQIRAE	Keratin, type I cytoskeletal 10 OS=Mus musculus OX=10090 GN=Krt10 PE=1 SV=3	KRT10			GPMKGGNF	Heterogeneous nuclear ribonucleoprotein A1 OS=Mus musculus OX=10090 GN=Hnrnpa1 PE=1 SV=2	HNRNPA1			KIDFEDVI	Caveolin-1 OS=Mus musculus OX=10090 GN=Cav1 PE=1 SV=1	CAV1
ELMGSNGPQK	NEDD4-like E3 ubiquitin-protein ligase WWP1 OS=Mus musculus OX=10090 GN=Wwp1 PE=1 SV=2	WWP1			GPMKGGSF	Heterogeneous nuclear ribonucleoprotein A3 OS=Mus musculus OX=10090 GN=Hnrnpa3 PE=1 SV=1	HNRNPA3			KKAQVAEA	DNA topoisomerase I, mitochondrial OS=Mus musculus OX=10090 GN=Top1mt PE=2 SV=1	TOP1MT
ESILGGVLK	Dedicator of cytokinesis protein 7 OS=Mus musculus OX=10090 GN=Dock7 PE=1 SV=3	DOCK7			GPMKGGSFGGR	Heterogeneous nuclear ribonucleoprotein A3 OS=Mus musculus OX=10090 GN=Hnrnpa3 PE=1 SV=1	HNRNPA3			KMEAEKIT	Msx2-interacting protein OS=Mus musculus OX=10090 GN=Spen PE=1 SV=2	SPEN
ESLKTPIK	TD and POZ domain-containing protein 1 OS=Mus musculus OX=10090 GN=Tdpoz1 PE=2 SV=1	TDPOZ1			GPMKSGNF	Heterogeneous nuclear ribonucleoproteins A2/B1 OS=Mus musculus OX=10090 GN=Hnrnpa2b1 PE=1 SV=2	HNRNPA2B1			KMREEVIT	Ras GTPase-activating-like protein IQGAP1 OS=Mus musculus OX=10090 GN=Iqgap1 PE=1 SV=2	IQGAP1
EVSGIPKPDVG	Myosin light chain kinase, smooth muscle OS=Mus musculus OX=10090 GN=Mylk PE=1 SV=3	MYLK			GPMKSGNFGGS	Heterogeneous nuclear ribonucleoproteins A2/B1 OS=Mus musculus OX=10090 GN=Hnrnpa2b1 PE=1 SV=2	HNRNPA2B1			KMVKEDKI	N-alpha-acetyltransferase 25, NatB auxiliary subunit OS=Mus musculus OX=10090 GN=Naa25 PE=1 SV=1	NAA25
EVSINEDGTL	F-box-like/WD repeat-containing protein TBL1XR1 OS=Mus musculus OX=10090 GN=Tbl1xr1 PE=1 SV=1	TBL1XR1			GPMKSGNFGGSR	Heterogeneous nuclear ribonucleoproteins A2/B1 OS=Mus musculus OX=10090 GN=Hnrnpa2b1 PE=1 SV=2	HNRNPA2B1			KNGEEIAQ	Major histocompatibility complex class I-related gene protein OS=Mus musculus OX=10090 GN=Mr1 PE=1 SV=2	MR1
EVSVTWMP	Macrophage colony-stimulating factor 1 receptor OS=Mus musculus OX=10090 GN=Csf1r PE=1 SV=3	CSF1R			GPYGGGGQYF	Heterogeneous nuclear ribonucleoprotein A1 OS=Mus musculus OX=10090 GN=Hnrnpa1 PE=1 SV=2	HNRNPA1			KNLEMKTI	OTU domain-containing protein 6A OS=Mus musculus OX=10090 GN=Otud6a PE=1 SV=1	OTUD6A
FAIVFGVAL	Neutral amino acid transporter B(0) OS=Mus musculus OX=10090 GN=Slc1a5 PE=1 SV=2	SLC1A5			GQIFRPDNF	Tubulin beta-5 chain OS=Mus musculus OX=10090 GN=Tubb5 PE=1 SV=1	TUBB5			KQRFSVFG	Peroxisome proliferator-activated receptor gamma coactivator-related protein 1 OS=Mus musculus OX=10090 GN=Pprc1 PE=1 SV=1	PPRC1
FLIGGIIGG	Synaptotagmin-15 OS=Mus musculus OX=10090 GN=Syt15 PE=2 SV=1	SYT15			GQIWPKAVY	Cysteine-rich secretory protein LCCL domain-containing 1 OS=Mus musculus OX=10090 GN=Crispld1 PE=2 SV=1	CRISPLD1			KQVQIAVT	Ubiquitin carboxyl-terminal hydrolase 40 OS=Mus musculus OX=10090 GN=Usp40 PE=1 SV=2	USP40
FLPMTIQT	Fibroblast growth factor 10 OS=Mus musculus OX=10090 GN=Fgf10 PE=2 SV=1	FGF10			GQVINETSQH	Vimentin OS=Mus musculus OX=10090 GN=Vim PE=1 SV=3	VIM			KTAFEFDV	Synaptonemal complex protein 1 OS=Mus musculus OX=10090 GN=Sycp1 PE=1 SV=2	SYCP1
FLQALGLG	Neuromedin-U receptor 1 OS=Mus musculus OX=10090 GN=Nmur1 PE=2 SV=2	NMUR1			GSIHSPKFP	Platelet-derived growth factor C OS=Mus musculus OX=10090 GN=Pdgfc PE=1 SV=2	PDGFC			LDQLEAEI	WD repeat-containing protein 34 OS=Mus musculus OX=10090 GN=Wdr34 PE=1 SV=2	WDR34
FLQSLGETA	Collagen alpha-4(VI) chain OS=Mus musculus OX=10090 GN=Col6a4 PE=1 SV=2	COL6A4			GSNFRGGS	Heterogeneous nuclear ribonucleoproteins A2/B1 OS=Mus musculus OX=10090 GN=Hnrnpa2b1 PE=1 SV=2	HNRNPA2B1			LIPCHRVV	Methylated-DNA--protein-cysteine methyltransferase OS=Mus musculus OX=10090 GN=Mgmt PE=1 SV=3	MGMT
FLSFMNLT	Wings apart-like protein homolog OS=Mus musculus OX=10090 GN=Wapl PE=1 SV=2	WAPL			GTAPSDNRVTS	NSFL1 cofactor p47 OS=Mus musculus OX=10090 GN=Nsfl1c PE=1 SV=1	NSFL1C			LPEKRDQV	Putative uncharacterized protein ZNRD1-AS1 OS=Mus musculus OX=10090 GN=Znrd1-as PE=2 SV=2	ZNRD1-AS
GAQAPVKAP	60S ribosomal protein L29 OS=Mus musculus OX=10090 GN=Rpl29 PE=1 SV=2	RPL29			IGGINCVTKK	UDP-glucuronosyltransferase 1-2 OS=Mus musculus OX=10090 GN=Ugt1a2 PE=1 SV=1	UGT1A2			LWDEMLLN	Thioredoxin domain-containing protein 3 OS=Mus musculus OX=10090 GN=Nme8 PE=2 SV=1	NME8
GDGIARVH	ATP synthase subunit alpha, mitochondrial OS=Mus musculus OX=10090 GN=Atp5f1a PE=1 SV=1	ATP5F1A			IGGSLECL	Thymus-specific serine protease OS=Mus musculus OX=10090 GN=Prss16 PE=2 SV=1	PRSS16			MKIHFEEI	Zinc finger protein 11 OS=Mus musculus OX=10090 GN=Zfp11 PE=2 SV=2	ZFP11
GFEAKVDVTG	Protein Aster-C OS=Mus musculus OX=10090 GN=Gramd1c PE=2 SV=2	GRAMD1C			IGTVLGFN	WD repeat and FYVE domain-containing protein 3 OS=Mus musculus OX=10090 GN=Wdfy3 PE=1 SV=1	WDFY3			MKSIIGIG	Protein NDRG3 OS=Mus musculus OX=10090 GN=Ndrg3 PE=1 SV=1	NDRG3
GGGGGLRQASAT	Centrosomal protein kizuna OS=Mus musculus OX=10090 GN=Kiz PE=1 SV=1	KIZ			IKTCTVAL	Unconventional myosin-XV OS=Mus musculus OX=10090 GN=Myo15a PE=1 SV=2	MYO15A			MPRHCSAA	THAP domain-containing protein 7 OS=Mus musculus OX=10090 GN=Thap7 PE=2 SV=1	THAP7
GGSGTSSRP	Vimentin OS=Mus musculus OX=10090 GN=Vim PE=1 SV=3	VIM			INFDFPKL	Probable ATP-dependent RNA helicase DDX6 OS=Mus musculus OX=10090 GN=Ddx6 PE=1 SV=1	DDX6			NLHMIPDT	Y-linked testis-specific protein 1 OS=Mus musculus OX=10090 GN=Ssty1 PE=1 SV=1	SSTY1
GIIDPTKVVR	60 kDa heat shock protein, mitochondrial OS=Mus musculus OX=10090 GN=Hspd1 PE=1 SV=1	HSPD1			ISIGVISGLG	Monocarboxylate transporter 7 OS=Mus musculus OX=10090 GN=Slc16a6 PE=1 SV=1	SLC16A6			PDFFIQDI	tRNA:m(4)X modification enzyme TRM13 homolog OS=Mus musculus OX=10090 GN=Trmt13 PE=2 SV=1	TRMT13
GILGKEGLKAG	U4/U6 small nuclear ribonucleoprotein Prp4 OS=Mus musculus OX=10090 GN=Prpf4 PE=1 SV=1	PRPF4			ITEFSDITR	Lamina-associated polypeptide 2, isoforms beta/delta/epsilon/gamma OS=Mus musculus OX=10090 GN=Tmpo PE=1 SV=4	TMPO			PEGGRVAM	Transcription factor SOX-17 OS=Mus musculus OX=10090 GN=Sox17 PE=1 SV=1	SOX17
GKATMTVDK	Ig heavy chain V region BCL1 OS=Mus musculus OX=10090 PE=4 SV=1	?			ITQTLSDM	Dynein heavy chain 1, axonemal OS=Mus musculus OX=10090 GN=Dnah1 PE=1 SV=1	DNAH1			PGRTGLPG	Macrophage receptor MARCO OS=Mus musculus OX=10090 GN=Marco PE=1 SV=1	MARCO
GLFVALLGG	Solute carrier family 35 member G3 OS=Mus musculus OX=10090 GN=Slc35g3 PE=2 SV=2	SLC35G3			IVEAIEVY	Protein FAM83G OS=Mus musculus OX=10090 GN=Fam83g PE=1 SV=1	FAM83G			PIFGPQEV	Polymeric immunoglobulin receptor OS=Mus musculus OX=10090 GN=Pigr PE=1 SV=1	PIGR
GLGSEKGR	BCL-6 corepressor OS=Mus musculus OX=10090 GN=Bcor PE=1 SV=2	BCOR			IYDKDPEGTVQP	Cysteine-rich protein 2 OS=Mus musculus OX=10090 GN=Crip2 PE=1 SV=1	CRIP2			PIMQGIAI	Anoctamin-6 OS=Mus musculus OX=10090 GN=Ano6 PE=1 SV=1	ANO6
GLKDSQVK	Homeobox protein DBX1 OS=Mus musculus OX=10090 GN=Dbx1 PE=2 SV=1	DBX1			KADGIVSKNF	40S ribosomal protein S21 OS=Mus musculus OX=10090 GN=Rps21 PE=1 SV=1	RPS21			PIVREGPE	Transmembrane protein 79 OS=Mus musculus OX=10090 GN=Tmem79 PE=1 SV=1	TMEM79
GLTSLPRV	Submandibular gland protein C OS=Mus musculus OX=10090 GN=Muc19 PE=1 SV=1	MUC19			KAPDNRETL	Dolichyl-diphosphooligosaccharide--protein glycosyltransferase subunit STT3B OS=Mus musculus OX=10090 GN=Stt3b PE=1 SV=2	STT3B			PLVDTHSK	(blank)	?
GSEDAVKARLA	Spectrin alpha chain, non-erythrocytic 1 OS=Mus musculus OX=10090 GN=Sptan1 PE=1 SV=4	SPTAN1			KEDAANNY	Tubulin alpha-1B chain OS=Mus musculus OX=10090 GN=Tuba1b PE=1 SV=2	TUBA1B			PTQFVGAI	Insulin-like growth factor 2 mRNA-binding protein 2 OS=Mus musculus OX=10090 GN=Igf2bp2 PE=1 SV=1	IGF2BP2
GVLSPFVLQ	Zinc finger SWIM domain-containing protein 8 OS=Mus musculus OX=10090 GN=Zswim8 PE=1 SV=1	ZSWIM8			KFAAATGATP	40S ribosomal protein SA OS=Mus musculus OX=10090 GN=Rpsa PE=1 SV=4	RPSA			PTYGVQQV	Very-long-chain enoyl-CoA reductase OS=Mus musculus OX=10090 GN=Tecr PE=1 SV=1	TECR
GYFPEPVTL	Ig gamma-2A chain C region, membrane-bound form OS=Mus musculus OX=10090 GN=Igh-1a PE=1 SV=3	IGH-1A			KFIDTTSKF	60S ribosomal protein L3 OS=Mus musculus OX=10090 GN=Rpl3 PE=1 SV=3	RPL3			QDLLMEHI	CDK5 regulatory subunit-associated protein 2 OS=Mus musculus OX=10090 GN=Cdk5rap2 PE=1 SV=3	CDK5RAP2
GYTTAFNIT	Sideroflexin-4 OS=Mus musculus OX=10090 GN=Sfxn4 PE=2 SV=2	SFXN4			KFLGDASE	Zinc finger FYVE domain-containing protein 1 OS=Mus musculus OX=10090 GN=Zfyve1 PE=1 SV=2	ZFYVE1			QERKIESI	SLIT and NTRK-like protein 5 OS=Mus musculus OX=10090 GN=Slitrk5 PE=2 SV=1	SLITRK5
HAVSEGTK	Histone H2B type 2-B OS=Mus musculus OX=10090 GN=Hist2h2bb PE=1 SV=3;Histone H2B type 1-F/J/L OS=Mus musculus OX=10090 GN=H2bc7 PE=1 SV=2	HIST2H2BB			KGSSNHNLLSAS	Conserved oligomeric Golgi complex subunit 7 OS=Mus musculus OX=10090 GN=Cog7 PE=1 SV=1	COG7			QSIQDELR	GON-4-like protein OS=Mus musculus OX=10090 GN=Gon4l PE=1 SV=3	GON4L
HLPHLRPLPESQ	Nuclear receptor corepressor 2 OS=Mus musculus OX=10090 GN=Ncor2 PE=1 SV=3	NCOR2			KIQLYQGI	Epidermal growth factor-like protein 6 OS=Mus musculus OX=10090 GN=Egfl6 PE=1 SV=1	EGFL6			QVMVDLVI	Solute carrier family 66 member 2 OS=Mus musculus OX=10090 GN=Slc66a2 PE=1 SV=1	SLC66A2
HTIKQAEKEA	(blank)	?			KKDNVAGV	V-type proton ATPase subunit D OS=Mus musculus OX=10090 GN=Atp6v1d PE=1 SV=1	ATP6V1D			QVVTGYYR	Neuronal PAS domain-containing protein 1 OS=Mus musculus OX=10090 GN=Npas1 PE=1 SV=1	NPAS1
IGGIGTVPVGR	Elongation factor 1-alpha 1 OS=Mus musculus OX=10090 GN=Eef1a1 PE=1 SV=3	EEF1A1			KKNMKELTP	WW domain-binding protein 11 OS=Mus musculus OX=10090 GN=Wbp11 PE=1 SV=2	WBP11			RDTVEEIV	(blank)	?
IGGIVAFIVF	Cell adhesion molecule 3 OS=Mus musculus OX=10090 GN=Cadm3 PE=1 SV=1	CADM3			KKPEVFNF	Protein SDA1 homolog OS=Mus musculus OX=10090 GN=Sdad1 PE=1 SV=1	SDAD1			REQGNGHI	ETS domain-containing protein Elk-1 OS=Mus musculus OX=10090 GN=Elk1 PE=1 SV=3	ELK1
IIAHSVGV	(blank)	?			KLCVFMGKTDP	Acyl-CoA dehydrogenase family member 10 OS=Mus musculus OX=10090 GN=Acad10 PE=1 SV=1	ACAD10			RERIERVR	BTB/POZ domain-containing adapter for CUL3-mediated RhoA degradation protein 3 OS=Mus musculus OX=10090 GN=Kctd10 PE=1 SV=1	KCTD10
ILQLFVGLAVG	Zinc transporter ZIP12 OS=Mus musculus OX=10090 GN=Slc39a12 PE=1 SV=1	SLC39A12			KQKMRTVF	Homeobox protein NANOG OS=Mus musculus molossinus OX=57486 GN=Nanog PE=2 SV=1	NANOG			RGFRSTKS	Beta-1,3-galactosyltransferase 2 OS=Mus musculus OX=10090 GN=B3galt2 PE=1 SV=2	B3GALT2
IMDGSESPT	FERM domain-containing protein 4A OS=Mus musculus OX=10090 GN=Frmd4a PE=1 SV=2	FRMD4A			KVDENGKISR	Ubiquitin-40S ribosomal protein S27a OS=Mus musculus OX=10090 GN=Rps27a PE=1 SV=2	RPS27A			RGKDQVVI	RNA cytidine acetyltransferase OS=Mus musculus OX=10090 GN=Nat10 PE=1 SV=1	NAT10
INMSEIAM	Beta-1,4-galactosyltransferase 5 OS=Mus musculus OX=10090 GN=B4galt5 PE=1 SV=2	B4GALT5			KVGIVGKY	60S ribosomal protein L37a OS=Mus musculus OX=10090 GN=Rpl37a PE=1 SV=2	RPL37A			RPSARFTV	Helicase with zinc finger domain 2 OS=Mus musculus OX=10090 GN=Helz2 PE=1 SV=1	HELZ2
IPMMYQQGEFY	Neuroserpin OS=Mus musculus OX=10090 GN=Serpini1 PE=1 SV=1	SERPINI1			LAEEFNTR	E3 ubiquitin-protein ligase NEDD4 OS=Mus musculus OX=10090 GN=Nedd4 PE=1 SV=3	NEDD4			SAFLEPYS	Glutamate receptor ionotropic, NMDA 2C OS=Mus musculus OX=10090 GN=Grin2c PE=1 SV=2;Glutamate receptor ionotropic, NMDA 2D OS=Mus musculus OX=10090 GN=Grin2d PE=1 SV=3	GRIN2C
ISIPGKDPDSP	Transmembrane glycoprotein NMB OS=Mus musculus OX=10090 GN=Gpnmb PE=1 SV=2	GPNMB			LCSSLESATY	Mitochondrial import receptor subunit TOM34 OS=Mus musculus OX=10090 GN=Tomm34 PE=1 SV=1	TOMM34			SAQLQMKT	Lysosome-associated membrane glycoprotein 3 OS=Mus musculus OX=10090 GN=Lamp3 PE=2 SV=1	LAMP3
IVAPPGGR	Dihydropyrimidinase-related protein 2 OS=Mus musculus OX=10090 GN=Dpysl2 PE=1 SV=2;Dihydropyrimidinase-related protein 1 OS=Mus musculus OX=10090 GN=Crmp1 PE=1 SV=1	DPYSL2			LEITDDQF	N-alpha-acetyltransferase 16, NatA auxiliary subunit OS=Mus musculus OX=10090 GN=Naa16 PE=2 SV=1	NAA16			SASFQRPQ	TNF receptor-associated factor 1 OS=Mus musculus OX=10090 GN=Traf1 PE=1 SV=2	TRAF1
IVPEIQAL	Teneurin-4 OS=Mus musculus OX=10090 GN=Tenm4 PE=1 SV=2	TENM4			LFVTMIVY	MARVEL domain-containing protein 2 OS=Mus musculus OX=10090 GN=Marveld2 PE=1 SV=1	MARVELD2			SCPFIYII	Nuclear pore complex protein Nup85 OS=Mus musculus OX=10090 GN=Nup85 PE=1 SV=1	NUP85
KAPSRNTIQ	Mitogen-activated protein kinase kinase kinase 1 OS=Mus musculus OX=10090 GN=Map3k1 PE=1 SV=3	MAP3K1			LPGDVAVAV	Valine--tRNA ligase, mitochondrial OS=Mus musculus OX=10090 GN=Vars2 PE=1 SV=2	VARS2			SGINPRKT	Potassium channel subfamily U member 1 OS=Mus musculus OX=10090 GN=Kcnu1 PE=1 SV=2	KCNU1
KCIVGVAGG	RUS1 family protein C16orf58 homolog OS=Mus musculus OX=10090 PE=1 SV=1	?			LRDNSTMGY	Heat shock protein HSP 90-beta OS=Mus musculus OX=10090 GN=Hsp90ab1 PE=1 SV=3	HSP90AB1			SGRDDLMD	Pleckstrin homology-like domain family B member 2 OS=Mus musculus OX=10090 GN=Phldb2 PE=1 SV=2	PHLDB2
KDAQSRVLGATS	Protein Shroom3 OS=Mus musculus OX=10090 GN=Shroom3 PE=1 SV=2	SHROOM3			LSVEEVVR	Tryptophan--tRNA ligase, mitochondrial OS=Mus musculus OX=10090 GN=Wars2 PE=1 SV=2	WARS2			SNPMPAVH	Apoptosis regulator Bcl-2 OS=Mus musculus OX=10090 GN=Bcl2 PE=1 SV=3	BCL2
KEKSGAVR	Attractin OS=Mus musculus OX=10090 GN=Atrn PE=1 SV=3	ATRN			LTFTLPVQ	Integrator complex subunit 8 OS=Mus musculus OX=10090 GN=Ints8 PE=1 SV=1	INTS8			SSFSRSFG	GATOR complex protein DEPDC5 OS=Mus musculus OX=10090 GN=Depdc5 PE=1 SV=2	DEPDC5
KELAVTENMR	Uncharacterized protein KIAA0895 OS=Mus musculus OX=10090 GN=Kiaa0895 PE=2 SV=2	KIAA0895			MEQVDGGYTL	Unconventional myosin-XV OS=Mus musculus OX=10090 GN=Myo15a PE=1 SV=2	MYO15A			TEEEALRI	(blank)	?
KKSSGGLLG	Pleckstrin homology domain-containing family O member 2 OS=Mus musculus OX=10090 GN=Plekho2 PE=1 SV=1	PLEKHO2			MFGGSGTSSRP	Vimentin OS=Mus musculus OX=10090 GN=Vim PE=1 SV=3	VIM			TGVTMEKI	DENN domain-containing protein 5B OS=Mus musculus OX=10090 GN=Dennd5b PE=1 SV=2	DENND5B
KMAILGLG	Carboxypeptidase Q OS=Mus musculus OX=10090 GN=Cpq PE=1 SV=1	CPQ			MIKYHPKF	Tyrosine-protein kinase Tec OS=Mus musculus OX=10090 GN=Tec PE=1 SV=2	TEC			TKAEMSHI	Transient receptor potential cation channel subfamily M member 7 OS=Mus musculus OX=10090 GN=Trpm7 PE=1 SV=1	TRPM7
KMEAEKIT	Msx2-interacting protein OS=Mus musculus OX=10090 GN=Spen PE=1 SV=2	SPEN			MVEKVPDSTY	26S proteasome regulatory subunit 8 OS=Mus musculus OX=10090 GN=Psmc5 PE=1 SV=1	PSMC5			TSCVKWEE	Methionyl-tRNA formyltransferase, mitochondrial OS=Mus musculus OX=10090 GN=Mtfmt PE=2 SV=3	MTFMT
KMEISQLT	Centrosomal protein of 63 kDa OS=Mus musculus OX=10090 GN=Cep63 PE=1 SV=2	CEP63			NCLRLGSM	Nucleoporin NUP188 homolog OS=Mus musculus OX=10090 GN=Nup188 PE=1 SV=2	NUP188			TSLDYMVT	Ran-binding protein 17 OS=Mus musculus OX=10090 GN=Ranbp17 PE=1 SV=1	RANBP17
KNGERGGPG	Collagen alpha-1(III) chain OS=Mus musculus OX=10090 GN=Col3a1 PE=1 SV=4	COL3A1			NEATGGKYVP	Tubulin beta-5 chain OS=Mus musculus OX=10090 GN=Tubb5 PE=1 SV=1	TUBB5			TSTSPIVK	Immunoglobulin kappa constant OS=Mus musculus OX=10090 GN=Igkc PE=1 SV=2	IGKC
KNLDDLTLLK	Coiled-coil domain-containing protein 58 OS=Mus musculus OX=10090 GN=Ccdc58 PE=1 SV=1	CCDC58			NEATGGKYVPR	Tubulin beta-5 chain OS=Mus musculus OX=10090 GN=Tubb5 PE=1 SV=1	TUBB5			TVAVGVIK	Elongation factor 1-alpha 1 OS=Mus musculus OX=10090 GN=Eef1a1 PE=1 SV=3;Elongation factor 1-alpha 2 OS=Mus musculus OX=10090 GN=Eef1a2 PE=1 SV=1	EEF1A1
KQGKINQMATA	Structural maintenance of chromosomes protein 3 OS=Mus musculus OX=10090 GN=Smc3 PE=1 SV=2	SMC3			NEDNGIIKAF	60S ribosomal protein L4 OS=Mus musculus OX=10090 GN=Rpl4 PE=1 SV=3	RPL4			TYLMDETI	ATP-binding cassette sub-family A member 8-B OS=Mus musculus OX=10090 GN=Abca8b PE=1 SV=2	ABCA8B
KRPLVVVYY	(blank)	?			NFASHAIVEDNV	GPI ethanolamine phosphate transferase 3 OS=Mus musculus OX=10090 GN=Pigo PE=1 SV=2	PIGO			VAALPEVQ	Histone-lysine N-methyltransferase 2A OS=Mus musculus OX=10090 GN=Kmt2a PE=1 SV=3	KMT2A
KSGKINVRP	Aryl hydrocarbon receptor nuclear translocator-like protein 2 OS=Mus musculus OX=10090 GN=Arntl2 PE=1 SV=2	ARNTL2			NLSKEDDVRQY	40S ribosomal protein S6 OS=Mus musculus OX=10090 GN=Rps6 PE=1 SV=1	RPS6			VAAQTKSK	Nuclear receptor coactivator 2 OS=Mus musculus OX=10090 GN=Ncoa2 PE=1 SV=3	NCOA2
KSNGGNLLCA	Echinoderm microtubule-associated protein-like 2 OS=Mus musculus OX=10090 GN=Eml2 PE=1 SV=1	EML2			NQFKSVISY	ATP synthase subunit gamma, mitochondrial OS=Mus musculus OX=10090 GN=Atp5f1c PE=1 SV=1	ATP5F1C			VAARPKNA	NEDD4-like E3 ubiquitin-protein ligase WWP1 OS=Mus musculus OX=10090 GN=Wwp1 PE=1 SV=2	WWP1
KTTESTPPAPT	Cyclic nucleotide-gated cation channel alpha-4 OS=Mus musculus OX=10090 GN=Cnga4 PE=2 SV=1	CNGA4			NQRLQEVY	Coiled-coil domain-containing protein 187 OS=Mus musculus OX=10090 GN=Ccdc187 PE=2 SV=1	CCDC187			VAAVLRAH	Acetolactate synthase-like protein OS=Mus musculus OX=10090 GN=Ilvbl PE=1 SV=1	ILVBL
KVILGSPAH	Serine protease HTRA2, mitochondrial OS=Mus musculus OX=10090 GN=Htra2 PE=1 SV=2	HTRA2			NQVANPNSAIF	Eukaryotic translation initiation factor 4H OS=Mus musculus OX=10090 GN=Eif4h PE=1 SV=3	EIF4H			VAFNTYAT	Acid sphingomyelinase-like phosphodiesterase 3b OS=Mus musculus OX=10090 GN=Smpdl3b PE=1 SV=1	SMPDL3B
KVVVSQTK	Nucleolin OS=Mus musculus OX=10090 GN=Ncl PE=1 SV=2	NCL			NSIRNLDTI	Ataxin-10 OS=Mus musculus OX=10090 GN=Atxn10 PE=1 SV=2	ATXN10			VAPFCSRE	Neurexin-2 OS=Mus musculus OX=10090 GN=Nrxn2 PE=1 SV=1	NRXN2
KYAAKVGV	Antizyme inhibitor 1 OS=Mus musculus OX=10090 GN=Azin1 PE=1 SV=1	AZIN1			NSNSHSSTF	Glyceraldehyde-3-phosphate dehydrogenase OS=Mus musculus OX=10090 GN=Gapdh PE=1 SV=2	GAPDH			VAVSMEVY	Fer-1-like protein 4 OS=Mus musculus OX=10090 GN=Fer1l4 PE=2 SV=3	FER1L4
LAALHEAVL	Protein phosphatase 1 regulatory subunit 27 OS=Mus musculus OX=10090 GN=Ppp1r27 PE=2 SV=1	PPP1R27			NTTSAVTVK	60S ribosomal protein L37a OS=Mus musculus OX=10090 GN=Rpl37a PE=1 SV=2	RPL37A			VAVWQGRI	Kelch-like protein 36 OS=Mus musculus OX=10090 GN=Klhl36 PE=1 SV=1	KLHL36
LDGCLRVEFHN	T-lymphoma invasion and metastasis-inducing protein 2 OS=Mus musculus OX=10090 GN=Tiam2 PE=1 SV=2	TIAM2			PEAPPPALPAGA	Ryanodine receptor 1 OS=Mus musculus OX=10090 GN=Ryr1 PE=1 SV=1	RYR1			VDIINFGE	26S proteasome non-ATPase regulatory subunit 4 OS=Mus musculus OX=10090 GN=Psmd4 PE=1 SV=1	PSMD4
LDIASVPRR	NADPH-dependent diflavin oxidoreductase 1 OS=Mus musculus OX=10090 GN=Ndor1 PE=2 SV=1	NDOR1			PEPLATQQPQ	Mitochondrial antiviral-signaling protein OS=Mus musculus OX=10090 GN=Mavs PE=1 SV=1	MAVS			VDQIHTHM	Transformation/transcription domain-associated protein OS=Mus musculus OX=10090 GN=Trrap PE=1 SV=2	TRRAP
LELGTGVR	Arpin OS=Mus musculus OX=10090 GN=Arpin PE=1 SV=1	ARPIN			PKEINLVDD	Tumor necrosis factor alpha-induced protein 3 OS=Mus musculus OX=10090 GN=Tnfaip3 PE=1 SV=2	TNFAIP3			VEADEETF	(blank)	?
LFFSVNLT	High affinity immunoglobulin alpha and immunoglobulin mu Fc receptor OS=Mus musculus OX=10090 GN=Fcamr PE=1 SV=2	FCAMR			PKPHSEAGTAF	Pyruvate kinase PKM OS=Mus musculus OX=10090 GN=Pkm PE=1 SV=4	PKM			VEDAQQMK	Forkhead-associated domain-containing protein 1 OS=Mus musculus OX=10090 GN=Fhad1 PE=2 SV=1	FHAD1
LFQVGLGL	Solute carrier family 26 member 6 OS=Mus musculus OX=10090 GN=Slc26a6 PE=1 SV=2	SLC26A6			PKPLFPVAG	Mannose-1-phosphate guanyltransferase alpha OS=Mus musculus OX=10090 GN=Gmppa PE=1 SV=1	GMPPA			VEGSEEYQ	Integrator complex subunit 14 OS=Mus musculus OX=10090 GN=Ints14 PE=1 SV=1	INTS14
LFVGVGLLGLG	PGAP2-interacting protein OS=Mus musculus OX=10090 GN=Cwh43 PE=1 SV=1	CWH43			PLENAPIGH	5,6-dihydroxyindole-2-carboxylic acid oxidase OS=Mus musculus OX=10090 GN=Tyrp1 PE=1 SV=1	TYRP1			VEKESEEN	HIV Tat-specific factor 1 homolog OS=Mus musculus OX=10090 GN=Htatsf1 PE=1 SV=1	HTATSF1
LGTVHSLGR	Basal cell adhesion molecule OS=Mus musculus OX=10090 GN=Bcam PE=1 SV=1	BCAM			PMMVTKQENI	Cadherin-13 OS=Mus musculus OX=10090 GN=Cdh13 PE=1 SV=2	CDH13			VEKMSMTE	E3 ubiquitin-protein ligase UBR5 OS=Mus musculus OX=10090 GN=Ubr5 PE=1 SV=2	UBR5
LLEPLGRRK	Spectrin beta chain, erythrocytic OS=Mus musculus OX=10090 GN=Sptb PE=1 SV=4	SPTB			PPPPALVPGY	Fidgetin OS=Mus musculus OX=10090 GN=Fign PE=1 SV=1	FIGN			VEWNGSWS	Calpain-3 OS=Mus musculus OX=10090 GN=Capn3 PE=2 SV=2	CAPN3
LLLPGELAK	Histone H2B type 2-B OS=Mus musculus OX=10090 GN=Hist2h2bb PE=1 SV=3;Histone H2B type 1-F/J/L OS=Mus musculus OX=10090 GN=H2bc7 PE=1 SV=2	HIST2H2BB			QATSLAGH	Solute carrier family 22 member 22 OS=Mus musculus OX=10090 GN=Slc22a22 PE=1 SV=1	SLC22A22			VFSQMTSM	Lymphocyte-specific helicase OS=Mus musculus OX=10090 GN=Hells PE=1 SV=2	HELLS
LPKIATAP	NACHT, LRR and PYD domains-containing protein 1a OS=Mus musculus OX=10090 GN=Nlrp1a PE=1 SV=1	NLRP1A			QISEFSFL	Myotubularin-related protein 4 OS=Mus musculus OX=10090 GN=Mtmr4 PE=1 SV=1	MTMR4			VGELEQML	Patatin-like phospholipase domain-containing protein 7 OS=Mus musculus OX=10090 GN=Pnpla7 PE=1 SV=1	PNPLA7
LPLDYGFAA	PILR alpha-associated neural protein OS=Mus musculus OX=10090 GN=Pianp PE=1 SV=1	PIANP			QMVLQGSVGA	Dedicator of cytokinesis protein 8 OS=Mus musculus OX=10090 GN=Dock8 PE=1 SV=4	DOCK8			VGITYQHI	Eukaryotic translation initiation factor 3 subunit K OS=Mus musculus OX=10090 GN=Eif3k PE=1 SV=1	EIF3K
LQAVLPPAV	SH3-containing GRB2-like protein 3-interacting protein 1 OS=Mus musculus OX=10090 GN=Sgip1 PE=1 SV=1	SGIP1			RAVANETGAFF	Transitional endoplasmic reticulum ATPase OS=Mus musculus OX=10090 GN=Vcp PE=1 SV=4	VCP			VHTSSKAL	BCL-6 corepressor-like protein 1 OS=Mus musculus OX=10090 GN=Bcorl1 PE=2 SV=1	BCORL1
LQEKFRPS	Isochorismatase domain-containing protein 2A OS=Mus musculus OX=10090 GN=Isoc2a PE=1 SV=1	ISOC2A			RCSPFQSAR	Fidgetin-like protein 1 OS=Mus musculus OX=10090 GN=Fignl1 PE=1 SV=1	FIGNL1			VIEDNTEI	Potassium/sodium hyperpolarization-activated cyclic nucleotide-gated channel 2 OS=Mus musculus OX=10090 GN=Hcn2 PE=1 SV=1	HCN2
LQIDNARLA	Keratin, type I cytoskeletal 16 OS=Mus musculus OX=10090 GN=Krt16 PE=1 SV=3;Keratin, type I cytoskeletal 12 OS=Mus musculus OX=10090 GN=Krt12 PE=1 SV=2;Keratin, type I cytoskeletal 10 OS=Mus musculus OX=10090 GN=Krt10 PE=1 SV=3	KRT16			RCVPVILELT	ATP-dependent DNA helicase PIF1 OS=Mus musculus OX=10090 GN=Pif1 PE=1 SV=2	PIF1			VISLFMMT	Taste receptor type 2 member 105 OS=Mus musculus OX=10090 GN=Tas2r105 PE=1 SV=1	TAS2R105
LVETGRRL	ER membrane protein complex subunit 1 OS=Mus musculus OX=10090 GN=Emc1 PE=1 SV=1	EMC1			RGGSSGAKF	60S ribosomal protein L23 OS=Mus musculus OX=10090 GN=Rpl23 PE=1 SV=1	RPL23			VREVIVVA	Iron-sulfur protein NUBPL OS=Mus musculus OX=10090 GN=Nubpl PE=1 SV=2	NUBPL
MEGQQRRLEE	Leucine-rich repeat-containing protein 45 OS=Mus musculus OX=10090 GN=Lrrc45 PE=2 SV=2	LRRC45			RGSGGGQGSTNY	Heterogeneous nuclear ribonucleoprotein A/B OS=Mus musculus OX=10090 GN=Hnrnpab PE=1 SV=1	HNRNPAB			VSIMQIAD	Transmembrane glycoprotein NMB OS=Mus musculus OX=10090 GN=Gpnmb PE=1 SV=2	GPNMB
MLPSILNQL	Transcription factor BTF3 OS=Mus musculus OX=10090 GN=Btf3 PE=1 SV=3	BTF3			RLQDGQTF	Monofunctional C1-tetrahydrofolate synthase, mitochondrial OS=Mus musculus OX=10090 GN=Mthfd1l PE=1 SV=2	MTHFD1L			VSPDQRKT	(blank)	?
MRLRNGTVATA	Alpha-1,3-mannosyl-glycoprotein 4-beta-N-acetylglucosaminyltransferase A OS=Mus musculus OX=10090 GN=Mgat4a PE=2 SV=1	MGAT4A			RMFGGSGTSSRP	Vimentin OS=Mus musculus OX=10090 GN=Vim PE=1 SV=3	VIM			VSVPQDPA	DENN domain-containing protein 11 OS=Mus musculus OX=10090 GN=Dennd11 PE=2 SV=1	DENND11
NGLQPLGDQD	SET-binding protein OS=Mus musculus OX=10090 GN=Setbp1 PE=1 SV=4	SETBP1			RMYKMVIV	Receptor-type tyrosine-protein phosphatase beta OS=Mus musculus OX=10090 GN=Ptprb PE=1 SV=1	PTPRB			VVAWHGYA	Klotho OS=Mus musculus OX=10090 GN=Kl PE=1 SV=2	KL
NGNNITMLVPG	U6 snRNA-associated Sm-like protein LSm5 OS=Mus musculus OX=10090 GN=Lsm5 PE=3 SV=2	LSM5			RPRNPPANH	NFX1-type zinc finger-containing protein 1 OS=Mus musculus OX=10090 GN=Znfx1 PE=1 SV=3	ZNFX1			YLNRDEEI	Protein DENND6A OS=Mus musculus OX=10090 GN=Dennd6a PE=1 SV=1	DENND6A
NKLGSTVLQ	Zinc finger protein 804A OS=Mus musculus OX=10090 GN=Znf804a PE=2 SV=1	ZNF804A			RQMAKRFLE	Outer dense fiber protein 2 OS=Mus musculus OX=10090 GN=Odf2 PE=1 SV=1	ODF2			YQKNSDTI	SH2 domain-containing protein 4A OS=Mus musculus OX=10090 GN=Sh2d4a PE=1 SV=1	SH2D4A
NLDAEFCSLR	SCO-spondin OS=Mus musculus OX=10090 GN=Sspo PE=2 SV=2	SSPO			RQSSGASSSSF	ATP-dependent RNA helicase DDX3X OS=Mus musculus OX=10090 GN=Ddx3x PE=1 SV=3	DDX3X			AAIRSCLEE	Dimethylaniline monooxygenase [N-oxide-forming] 3 OS=Mus musculus OX=10090 GN=Fmo3 PE=1 SV=1	FMO3
NPNVLVLK	Graves disease carrier protein homolog OS=Mus musculus OX=10090 GN=Slc25a16 PE=1 SV=1	SLC25A16			RSGQGAFGNM	60S ribosomal protein L4 OS=Mus musculus OX=10090 GN=Rpl4 PE=1 SV=3	RPL4			AAISLYMDI	Protein lifeguard 4 OS=Mus musculus OX=10090 GN=Tmbim4 PE=2 SV=1	TMBIM4
NQREGVLEPNPV	Coiled-coil domain-containing protein 9 OS=Mus musculus OX=10090 GN=Ccdc9 PE=1 SV=1	CCDC9			RTGNPTGTY	Probable ATP-dependent RNA helicase DDX5 OS=Mus musculus OX=10090 GN=Ddx5 PE=1 SV=2	DDX5			AAISQSLSE	Nuclear factor erythroid 2-related factor 2 OS=Mus musculus OX=10090 GN=Nfe2l2 PE=1 SV=2	NFE2L2
NVEIDPEIQ	Keratin, type II cytoskeletal 79 OS=Mus musculus OX=10090 GN=Krt79 PE=1 SV=2	KRT79			RTGNPTGTYQNG	Probable ATP-dependent RNA helicase DDX5 OS=Mus musculus OX=10090 GN=Ddx5 PE=1 SV=2	DDX5			AAIVDGDRI	Serine/threonine-protein kinase MRCK beta OS=Mus musculus OX=10090 GN=Cdc42bpb PE=1 SV=2	CDC42BPB
NYSLLSTP	Spermatogenesis-associated protein 46 OS=Mus musculus OX=10090 GN=Spata46 PE=2 SV=1	SPATA46			RTVENVTVF	Synaptic vesicle membrane protein VAT-1 homolog OS=Mus musculus OX=10090 GN=Vat1 PE=1 SV=3	VAT1			ACQGHKVQP	(blank)	?
PFIAIHAESKI	Alpha-amylase 1 OS=Mus musculus OX=10090 GN=Amy1 PE=1 SV=2	AMY1			RVPTPNVSVVD	Glyceraldehyde-3-phosphate dehydrogenase OS=Mus musculus OX=10090 GN=Gapdh PE=1 SV=2	GAPDH			AEIGCKTSM	Tubulin-specific chaperone E OS=Mus musculus OX=10090 GN=Tbce PE=1 SV=1	TBCE
PFPRAEDSGGSL	RasGAP-activating-like protein 1 OS=Mus musculus OX=10090 GN=Rasal1 PE=1 SV=2	RASAL1			RVVDLMAY	Glyceraldehyde-3-phosphate dehydrogenase OS=Mus musculus OX=10090 GN=Gapdh PE=1 SV=2	GAPDH			AGRPPELGQ	L-fucose kinase OS=Mus musculus OX=10090 GN=Fcsk PE=1 SV=1	FCSK
PGGPGGLSTKP	Integrin alpha-5 OS=Mus musculus OX=10090 GN=Itga5 PE=1 SV=3	ITGA5			RYQEYVTR	Peroxisomal membrane protein PEX16 OS=Mus musculus OX=10090 GN=Pex16 PE=1 SV=2	PEX16			AGSINYPDK	(blank)	?
PLPVLGLGGL	Dual specificity protein phosphatase 6 OS=Mus musculus OX=10090 GN=Dusp6 PE=1 SV=1	DUSP6			SAINEVVTR	60S ribosomal protein L31 OS=Mus musculus OX=10090 GN=Rpl31 PE=1 SV=1	RPL31			AIVGQAQEI	Serine/threonine-protein kinase WNK3 OS=Mus musculus OX=10090 GN=Wnk3 PE=1 SV=3	WNK3
PPLLAARLVPP	RNA-binding protein 27 OS=Mus musculus OX=10090 GN=Rbm27 PE=1 SV=3	RBM27			SAINEVVTREY	60S ribosomal protein L31 OS=Mus musculus OX=10090 GN=Rpl31 PE=1 SV=1	RPL31			ANHKGAVVI	Integrin alpha-7 OS=Mus musculus OX=10090 GN=Itga7 PE=1 SV=3	ITGA7
PPPLGGVLPP	Disheveled-associated activator of morphogenesis 1 OS=Mus musculus OX=10090 GN=Daam1 PE=1 SV=4	DAAM1			SAPENAVRM	Protein C10 OS=Mus musculus OX=10090 GN=Grcc10 PE=1 SV=1	GRCC10			ASIIDMGEE	Calcium-dependent secretion activator 1 OS=Mus musculus OX=10090 GN=Cadps PE=1 SV=3	CADPS
PPPPGASGV	Protein transport protein Sec16A OS=Mus musculus OX=10090 GN=Sec16a PE=1 SV=1	SEC16A			SAPGGGNKVPQK	Nucleophosmin OS=Mus musculus OX=10090 GN=Npm1 PE=1 SV=1	NPM1			ASPERSGWT	YrdC domain-containing protein, mitochondrial OS=Mus musculus OX=10090 GN=Yrdc PE=1 SV=1	YRDC
PSAFAVSSSTTG	Germinal-center associated nuclear protein OS=Mus musculus OX=10090 GN=Mcm3ap PE=1 SV=2	MCM3AP			SAPRNFVENF	Elongator complex protein 2 OS=Mus musculus OX=10090 GN=Elp2 PE=1 SV=1	ELP2			ASPSSSCVM	Neuron navigator 3 OS=Mus musculus OX=10090 GN=Nav3 PE=1 SV=2	NAV3
PSELVEALRT	Potassium-transporting ATPase alpha chain 1 OS=Mus musculus OX=10090 GN=Atp4a PE=1 SV=3	ATP4A			SGGFGARDY	ATP-dependent RNA helicase DDX3X OS=Mus musculus OX=10090 GN=Ddx3x PE=1 SV=3	DDX3X			ASSQGPMCT	A disintegrin and metalloproteinase with thrombospondin motifs 4 OS=Mus musculus OX=10090 GN=Adamts4 PE=2 SV=2	ADAMTS4
PSTAAPINVASV	Zinc finger CCCH domain-containing protein 6 OS=Mus musculus OX=10090 GN=Zc3h6 PE=2 SV=2	ZC3H6			SGKAPPNLP	Ubiquitin-associated protein 2-like OS=Mus musculus OX=10090 GN=Ubap2l PE=1 SV=1	UBAP2L			ASVNGQMPQ	OTU domain-containing protein 4 OS=Mus musculus OX=10090 GN=Otud4 PE=1 SV=1	OTUD4
QATPYGRCANV	DENN domain-containing protein 4C OS=Mus musculus OX=10090 GN=Dennd4c PE=1 SV=1	DENND4C			SIAKEGFEK	60 kDa heat shock protein, mitochondrial OS=Mus musculus OX=10090 GN=Hspd1 PE=1 SV=1	HSPD1			AVINHMCGA	Pancreatic alpha-amylase OS=Mus musculus OX=10090 GN=Amy2 PE=1 SV=2	AMY2
QISAKQLK	Membrane-associated guanylate kinase, WW and PDZ domain-containing protein 3 OS=Mus musculus OX=10090 GN=Magi3 PE=1 SV=2	MAGI3			SIGDTEIYL	Otogelin-like protein OS=Mus musculus OX=10090 GN=Otogl PE=1 SV=1	OTOGL			AVINHMCGV	Alpha-amylase 1 OS=Mus musculus OX=10090 GN=Amy1 PE=1 SV=2	AMY1
QSLLGAPL	Dyslexia-associated protein KIAA0319-like protein OS=Mus musculus OX=10090 GN=Kiaa0319l PE=1 SV=1	KIAA0319L			SIRSGYEVM	CD63 antigen OS=Mus musculus OX=10090 GN=Cd63 PE=1 SV=2	CD63			AVMGSMFAV	Leucine-rich repeat neuronal protein 1 OS=Mus musculus OX=10090 GN=Lrrn1 PE=2 SV=1	LRRN1
QSVLPVPSTHI	(blank)	?			SLEDPQTH	Heat shock protein HSP 90-beta OS=Mus musculus OX=10090 GN=Hsp90ab1 PE=1 SV=3	HSP90AB1			AWIGGKSLE	Transmembrane protein 263 OS=Mus musculus OX=10090 GN=Tmem263 PE=1 SV=1	TMEM263
QTVAVGVIK	Elongation factor 1-alpha 1 OS=Mus musculus OX=10090 GN=Eef1a1 PE=1 SV=3	EEF1A1			SPAAVINLTSE	Amyloid-beta A4 precursor protein-binding family B member 2 OS=Mus musculus OX=10090 GN=Apbb2 PE=1 SV=2	APBB2			CAEGYETQP	Low-density lipoprotein receptor-related protein 1B OS=Mus musculus OX=10090 GN=Lrp1b PE=1 SV=1	LRP1B
QVLEMQMEK	Mitotic spindle assembly checkpoint protein MAD1 OS=Mus musculus OX=10090 GN=Mad1l1 PE=1 SV=1	MAD1L1			SQPVNPHSL	Zinc finger SWIM domain-containing protein 8 OS=Mus musculus OX=10090 GN=Zswim8 PE=1 SV=1	ZSWIM8			CSKAPKVVI	Protein L-Myc OS=Mus musculus OX=10090 GN=Mycl PE=2 SV=1	MYCL
RAAVAASSSS	60S ribosomal protein L37 OS=Mus musculus OX=10090 GN=Rpl37 PE=3 SV=3	RPL37			SSGTFSKTF	Pregnancy zone protein OS=Mus musculus OX=10090 GN=Pzp PE=1 SV=3	PZP			CVSDKAVSM	Latent-transforming growth factor beta-binding protein 2 OS=Mus musculus OX=10090 GN=Ltbp2 PE=1 SV=2	LTBP2
RCLGGRSPK	Ran-binding protein 9 OS=Mus musculus OX=10090 GN=Ranbp9 PE=1 SV=1	RANBP9			SSIVLDARD	MutS protein homolog 4 OS=Mus musculus OX=10090 GN=Msh4 PE=2 SV=1	MSH4			DADKVREAI	Cytosolic 5'-nucleotidase 1A OS=Mus musculus OX=10090 GN=Nt5c1a PE=1 SV=1	NT5C1A
RDATRVLQ	(blank)	?			SSPGGAYVTR	Vimentin OS=Mus musculus OX=10090 GN=Vim PE=1 SV=3	VIM			DESGPSIVH	Actin, cytoplasmic 1 OS=Mus musculus OX=10090 GN=Actb PE=1 SV=1	ACTB
RDLQIKLSQ	Centromere-associated protein E OS=Mus musculus OX=10090 GN=Cenpe PE=1 SV=1	CENPE			SSSPGGAYVTR	Vimentin OS=Mus musculus OX=10090 GN=Vim PE=1 SV=3	VIM			DMEIPLVSI	(blank)	?
REILSILGLP	Bone morphogenetic protein 5 OS=Mus musculus OX=10090 GN=Bmp5 PE=2 SV=1	BMP5			SVNVDYSK	Cytochrome c oxidase subunit NDUFA4 OS=Mus musculus OX=10090 GN=Ndufa4 PE=1 SV=2	NDUFA4			DPTKQAEEI	(blank)	?
RGDLSVTA	Mediator of RNA polymerase II transcription subunit 12-like protein OS=Mus musculus OX=10090 GN=Med12l PE=1 SV=2	MED12L			SYVTTSTR	Vimentin OS=Mus musculus OX=10090 GN=Vim PE=1 SV=3	VIM			DVLQHVDTI	Monoglyceride lipase OS=Mus musculus OX=10090 GN=Mgll PE=1 SV=1	MGLL
RGGAGVGSM	40S ribosomal protein S19 OS=Mus musculus OX=10090 GN=Rps19 PE=1 SV=3	RPS19			SYVTTSTRTY	Vimentin OS=Mus musculus OX=10090 GN=Vim PE=1 SV=3	VIM			DYINASPIM	(blank)	?
RPGELVLD	Crossover junction endonuclease MUS81 OS=Mus musculus OX=10090 GN=Mus81 PE=1 SV=2	MUS81			TARGSQQY	Tubulin beta-3 chain OS=Mus musculus OX=10090 GN=Tubb3 PE=1 SV=1	TUBB3			ELQALQEEL	Tubulin epsilon and delta complex protein 1 OS=Mus musculus OX=10090 GN=Tedc1 PE=1 SV=2	TEDC1
RPYSSGPV	Kalirin OS=Mus musculus OX=10090 GN=Kalrn PE=1 SV=1	KALRN			TEASRLTV	Chondroitin sulfate synthase 2 OS=Mus musculus OX=10090 GN=Chpf PE=1 SV=1	CHPF			FLQGAYDTI	(blank)	?
RTQAPAVATT	40S ribosomal protein S2 OS=Mus musculus OX=10090 GN=Rps2 PE=1 SV=3	RPS2			TEATLSFGY	Contactin-1 OS=Mus musculus OX=10090 GN=Cntn1 PE=1 SV=1	CNTN1			FQQVPMVEI	Glutathione S-transferase A3 OS=Mus musculus OX=10090 GN=Gsta3 PE=1 SV=2	GSTA3
RTSALLGAR	DNA polymerase nu OS=Mus musculus OX=10090 GN=Poln PE=2 SV=2	POLN			TEDWLLLG	Transducin-like enhancer protein 6 OS=Mus musculus OX=10090 GN=Tle6 PE=1 SV=1	TLE6			GEPLQAAAS	40-kDa huntingtin-associated protein OS=Mus musculus OX=10090 GN=F8a1 PE=1 SV=1	F8A1
SIGDGIARVH	ATP synthase subunit alpha, mitochondrial OS=Mus musculus OX=10090 GN=Atp5f1a PE=1 SV=1	ATP5F1A			TEVLKTNGLLV	60S ribosomal protein L13a OS=Mus musculus OX=10090 GN=Rpl13a PE=1 SV=4	RPL13A			GFFDRGASI	Glutamate dehydrogenase 1, mitochondrial OS=Mus musculus OX=10090 GN=Glud1 PE=1 SV=1	GLUD1
SIGLAQTL	Protein MTO1 homolog, mitochondrial OS=Mus musculus OX=10090 GN=Mto1 PE=2 SV=1	MTO1			TGPSNVDKL	Serine/threonine-protein kinase Chk1 OS=Mus musculus OX=10090 GN=Chek1 PE=1 SV=2	CHEK1			GGIQNVGHI	Inosine-5'-monophosphate dehydrogenase 2 OS=Mus musculus OX=10090 GN=Impdh2 PE=1 SV=2	IMPDH2
SIIQNIVGTA	Surfeit locus protein 4 OS=Mus musculus OX=10090 GN=Surf4 PE=1 SV=1	SURF4			TNAVIINLA	Visual pigment-like receptor peropsin OS=Mus musculus OX=10090 GN=Rrh PE=1 SV=1	RRH			GIISAQNIY	Inactive serine/threonine-protein kinase TEX14 OS=Mus musculus OX=10090 GN=Tex14 PE=1 SV=2	TEX14
SLEDPQTH	Heat shock protein HSP 90-alpha OS=Mus musculus OX=10090 GN=Hsp90aa1 PE=1 SV=4;Heat shock protein HSP 90-beta OS=Mus musculus OX=10090 GN=Hsp90ab1 PE=1 SV=3	HSP90AA1			TNEGVIEFR	Serine/arginine-rich splicing factor 6 OS=Mus musculus OX=10090 GN=Srsf6 PE=1 SV=1	SRSF6			GPMFEAMIM	U2 snRNP-associated SURP motif-containing protein OS=Mus musculus OX=10090 GN=U2surp PE=1 SV=3	U2SURP
SLVNICLI	E3 ubiquitin-protein ligase RNF26 OS=Mus musculus OX=10090 GN=Rnf26 PE=2 SV=1	RNF26			TNTMRVVPVP	Pyruvate kinase PKM OS=Mus musculus OX=10090 GN=Pkm PE=1 SV=4	PKM			GTCNPIDRS	Multiple epidermal growth factor-like domains protein 10 OS=Mus musculus OX=10090 GN=Megf10 PE=1 SV=1	MEGF10
SSAPAATPQLV	Uncharacterized protein C4orf54 homolog OS=Mus musculus OX=10090 PE=1 SV=1	?			TPGNRIVY	60S ribosomal protein L34 OS=Mus musculus OX=10090 GN=Rpl34 PE=1 SV=2	RPL34			GTPEKASER	Band 4.1-like protein 1 OS=Mus musculus OX=10090 GN=Epb41l1 PE=1 SV=2	EPB41L1
SSSKSMTQT	Hedgehog-interacting protein OS=Mus musculus OX=10090 GN=Hhip PE=1 SV=2	HHIP			TRGEADRDTY	40S ribosomal protein S10 OS=Mus musculus OX=10090 GN=Rps10 PE=1 SV=1	RPS10			GYRGTGEIV	Cilia- and flagella-associated protein 299 OS=Mus musculus OX=10090 GN=Cfap299 PE=2 SV=1	CFAP299
SSTPEVKA	Serine-threonine kinase receptor-associated protein OS=Mus musculus OX=10090 GN=Strap PE=1 SV=2	STRAP			TSRGSQQY	Tubulin beta-5 chain OS=Mus musculus OX=10090 GN=Tubb5 PE=1 SV=1	TUBB5			HDVLEVTVF	Multiple C2 and transmembrane domain-containing protein 2 OS=Mus musculus OX=10090 GN=Mctp2 PE=2 SV=1	MCTP2
SSYTMGKT	Divergent protein kinase domain 2B OS=Mus musculus OX=10090 GN=Dipk2b PE=2 SV=1	DIPK2B			TSVRFTQL	Nitric oxide synthase-interacting protein OS=Mus musculus OX=10090 GN=Nosip PE=1 SV=1	NOSIP			HLHGIFPYL	DNA polymerase zeta catalytic subunit OS=Mus musculus OX=10090 GN=Rev3l PE=1 SV=3	REV3L
TEELYAIK	Protein kinase C alpha type OS=Mus musculus OX=10090 GN=Prkca PE=1 SV=3	PRKCA			TTMEKAGAHL	Glyceraldehyde-3-phosphate dehydrogenase OS=Mus musculus OX=10090 GN=Gapdh PE=1 SV=2	GAPDH			HLISGHAHV	Serine/threonine-protein kinase mTOR OS=Mus musculus OX=10090 GN=Mtor PE=1 SV=2	MTOR
TGPVMPIR	60S ribosomal protein L13 OS=Mus musculus OX=10090 GN=Rpl13 PE=1 SV=3	RPL13			TTRSFDSEF	Cytoplasmic dynein 1 heavy chain 1 OS=Mus musculus OX=10090 GN=Dync1h1 PE=1 SV=2	DYNC1H1			HLSPEAEEI	Probable ubiquitin carboxyl-terminal hydrolase FAF-X OS=Mus musculus OX=10090 GN=Usp9x PE=1 SV=2	USP9X
TGRRGGNP	Sphingosine 1-phosphate receptor 2 OS=Mus musculus OX=10090 GN=S1pr2 PE=1 SV=3	S1PR2			TVTKTVSNDSFF	Nucleosome assembly protein 1-like 1 OS=Mus musculus OX=10090 GN=Nap1l1 PE=1 SV=2	NAP1L1			HPELVGMPV	Zinc finger protein 524 OS=Mus musculus OX=10090 GN=Znf524 PE=2 SV=1	ZNF524
TNAENEFVTIK	Keratin, type II cytoskeletal 1 OS=Mus musculus OX=10090 GN=Krt1 PE=1 SV=4	KRT1			VAFDFTKV	Phosphatidylinositol-binding clathrin assembly protein OS=Mus musculus OX=10090 GN=Picalm PE=1 SV=1	PICALM			IAFPTLGAI	Adhesion G-protein coupled receptor F2 OS=Mus musculus OX=10090 GN=Adgrf2 PE=2 SV=1	ADGRF2
TSTSPIVK	Immunoglobulin kappa constant OS=Mus musculus OX=10090 GN=Igkc PE=1 SV=2	IGKC			VAGGAGLAVPG	Polycystin-2 OS=Mus musculus OX=10090 GN=Pkd2 PE=1 SV=2	PKD2			IAVKQADEI	Actin-related protein 2/3 complex subunit 4 OS=Mus musculus OX=10090 GN=Arpc4 PE=1 SV=3	ARPC4
TTRRGRSPTM	Neurexin-2 OS=Mus musculus OX=10090 GN=Nrxn2 PE=1 SV=1	NRXN2			VAIMIVTY	D(1B) dopamine receptor OS=Mus musculus OX=10090 GN=Drd5 PE=2 SV=1	DRD5			IETVQSEII	Solute carrier family 25 member 46 OS=Mus musculus OX=10090 GN=Slc25a46 PE=1 SV=1	SLC25A46
TVAVGVIK	Elongation factor 1-alpha 1 OS=Mus musculus OX=10090 GN=Eef1a1 PE=1 SV=3	EEF1A1			VATYIPGI	Dolichol kinase OS=Mus musculus OX=10090 GN=Dolk PE=1 SV=1	DOLK			IGPTTPTHT	(blank)	?
TVPIEAVTSK	Src substrate cortactin OS=Mus musculus OX=10090 GN=Cttn PE=1 SV=2	CTTN			VDNAFKHGL	Microtubule-actin cross-linking factor 1 OS=Mus musculus OX=10090 GN=Macf1 PE=1 SV=2	MACF1			IHGGASMIM	Glutamate receptor ionotropic, NMDA 2A OS=Mus musculus OX=10090 GN=Grin2a PE=1 SV=2	GRIN2A
TVRNDITLLK	Chymotrypsinogen B OS=Mus musculus OX=10090 GN=Ctrb1 PE=1 SV=1	CTRB1			VGGIIVGF	Ammonium transporter Rh type C OS=Mus musculus OX=10090 GN=Rhcg PE=1 SV=2	RHCG			ISIEKDSDS	Suppressor of cytokine signaling 5 OS=Mus musculus OX=10090 GN=Socs5 PE=1 SV=2	SOCS5
TVVNISNK	Voltage-dependent R-type calcium channel subunit alpha-1E OS=Mus musculus OX=10090 GN=Cacna1e PE=1 SV=1	CACNA1E			VKVGVNGF	Glyceraldehyde-3-phosphate dehydrogenase OS=Mus musculus OX=10090 GN=Gapdh PE=1 SV=2	GAPDH			ISIFSGTEK	Serine/threonine-protein kinase PAK 2 OS=Mus musculus OX=10090 GN=Pak2 PE=1 SV=1	PAK2
VDQLDFWE	Neuronal acetylcholine receptor subunit alpha-4 OS=Mus musculus OX=10090 GN=Chrna4 PE=1 SV=2	CHRNA4			VLRPPGGGSNF	Jupiter microtubule associated homolog 1 OS=Mus musculus OX=10090 GN=Jpt1 PE=1 SV=3	JPT1			ISILETEST	Inter alpha-trypsin inhibitor, heavy chain 4 OS=Mus musculus OX=10090 GN=Itih4 PE=1 SV=2	ITIH4
VDQWHFVSSAP	Peroxisomal leader peptide-processing protease OS=Mus musculus OX=10090 GN=Tysnd1 PE=1 SV=1	TYSND1			VMLPLVPGDR	Complement C1q tumor necrosis factor-related protein 6 OS=Mus musculus OX=10090 GN=C1qtnf6 PE=2 SV=1	C1QTNF6			ISIYKSSQG	Rho guanine nucleotide exchange factor 10 OS=Mus musculus OX=10090 GN=Arhgef10 PE=1 SV=2	ARHGEF10
VEDAQQMK	Forkhead-associated domain-containing protein 1 OS=Mus musculus OX=10090 GN=Fhad1 PE=2 SV=1	FHAD1			VNAAIATIK	Tubulin alpha-1B chain OS=Mus musculus OX=10090 GN=Tuba1b PE=1 SV=2	TUBA1B			ISNQEAFVI	Dystonin OS=Mus musculus OX=10090 GN=Dst PE=1 SV=2	DST
VEPCDLTEG	Gem-associated protein 2 OS=Mus musculus OX=10090 GN=Gemin2 PE=2 SV=1	GEMIN2			VNFEFPEF	40S ribosomal protein S7 OS=Mus musculus OX=10090 GN=Rps7 PE=2 SV=1	RPS7			ISPTMDLVT	Mas-related G-protein coupled receptor member D OS=Mus musculus OX=10090 GN=Mrgprd PE=2 SV=1	MRGPRD
VLNMERALR	Prolyl 3-hydroxylase 1 OS=Mus musculus OX=10090 GN=P3h1 PE=1 SV=2	P3H1			VNFEKMRM	Rap guanine nucleotide exchange factor 4 OS=Mus musculus OX=10090 GN=Rapgef4 PE=1 SV=1	RAPGEF4			ITNSKTEVT	Protein shisa-9 OS=Mus musculus OX=10090 GN=Shisa9 PE=1 SV=2	SHISA9
VLSNSGWGQ	Trinucleotide repeat-containing gene 6C protein OS=Mus musculus OX=10090 GN=Tnrc6c PE=1 SV=2;Trinucleotide repeat-containing gene 6A protein OS=Mus musculus OX=10090 GN=Tnrc6a PE=1 SV=2	TNRC6C			VPPVSVPRY	Membrane-associated phosphatidylinositol transfer protein 3 OS=Mus musculus OX=10090 GN=Pitpnm3 PE=1 SV=2	PITPNM3			IVHEPGPVM	DNA repair protein complementing XP-A cells homolog OS=Mus musculus OX=10090 GN=Xpa PE=1 SV=2	XPA
VSEKGTVQQ	60S ribosomal protein L9 OS=Mus musculus OX=10090 GN=Rpl9 PE=2 SV=2	RPL9			VQNKNSSYF	Tubulin beta-5 chain OS=Mus musculus OX=10090 GN=Tubb5 PE=1 SV=1	TUBB5			IVPERDGNE	Attractin OS=Mus musculus OX=10090 GN=Atrn PE=1 SV=3	ATRN
VSINEDGTL	F-box-like/WD repeat-containing protein TBL1XR1 OS=Mus musculus OX=10090 GN=Tbl1xr1 PE=1 SV=1	TBL1XR1			VQTKGTGASGSF	Histone H1.4 OS=Mus musculus OX=10090 GN=H1-4 PE=1 SV=2;Histone H1t OS=Mus musculus OX=10090 GN=Hist1h1t PE=1 SV=4	H1-4			IVVDPLNGW	Prolow-density lipoprotein receptor-related protein 1 OS=Mus musculus OX=10090 GN=Lrp1 PE=1 SV=1	LRP1
VSLVAASDG	Inhibitor of Bruton tyrosine kinase OS=Mus musculus OX=10090 GN=Ibtk PE=1 SV=3	IBTK			VSPRESPF	Transferrin receptor protein 1 OS=Mus musculus OX=10090 GN=Tfrc PE=1 SV=1	TFRC			KAPLERQDS	Sorting nexin-33 OS=Mus musculus OX=10090 GN=Snx33 PE=1 SV=1	SNX33
VSTVYTQDQ	Dedicator of cytokinesis protein 9 OS=Mus musculus OX=10090 GN=Dock9 PE=1 SV=2	DOCK9			VTDVGVHLQ	Volume-regulated anion channel subunit LRRC8A OS=Mus musculus OX=10090 GN=Lrrc8a PE=1 SV=1	LRRC8A			KEKERIAVQ	Golgin subfamily A member 3 OS=Mus musculus OX=10090 GN=Golga3 PE=1 SV=3	GOLGA3
VTDSLVPRS	Putative Polycomb group protein ASXL3 OS=Mus musculus OX=10090 GN=Asxl3 PE=2 SV=3	ASXL3			VTTSTRTY	Vimentin OS=Mus musculus OX=10090 GN=Vim PE=1 SV=3	VIM			KMQKLMKAA	Rho guanine nucleotide exchange factor 10 OS=Mus musculus OX=10090 GN=Arhgef10 PE=1 SV=2	ARHGEF10
VVFAVVGLVAG	Solute carrier family 22 member 2 OS=Mus musculus OX=10090 GN=Slc22a2 PE=1 SV=1	SLC22A2			VVGGIDRVY	Lysine--tRNA ligase OS=Mus musculus OX=10090 GN=Kars1 PE=1 SV=1	KARS1			KSILQDMGI	Serpin B12 OS=Mus musculus OX=10090 GN=Serpinb12 PE=2 SV=1	SERPINB12
VWDLLLGM	Transmembrane protein FAM155B OS=Mus musculus OX=10090 GN=Fam155b PE=3 SV=1	FAM155B			YDISAKSNY	GTP-binding nuclear protein Ran OS=Mus musculus OX=10090 GN=Ran PE=1 SV=3	RAN			KTPKEDPNR	Phosphorylase b kinase regulatory subunit alpha, skeletal muscle isoform OS=Mus musculus OX=10090 GN=Phka1 PE=1 SV=3	PHKA1
YADRVTFSSS	Junctional adhesion molecule A OS=Mus musculus OX=10090 GN=F11r PE=1 SV=2	F11R			YGSEATGH	Protein SFI1 homolog OS=Mus musculus OX=10090 GN=Sfi1 PE=2 SV=1	SFI1			KVDMFSYGM	Leucine-rich repeat serine/threonine-protein kinase 1 OS=Mus musculus OX=10090 GN=Lrrk1 PE=1 SV=1	LRRK1
YEEAAAQGVIA	Protein MTO1 homolog, mitochondrial OS=Mus musculus OX=10090 GN=Mto1 PE=2 SV=1	MTO1			YLSRNVVHS	Bromodomain adjacent to zinc finger domain protein 2A OS=Mus musculus OX=10090 GN=Baz2a PE=1 SV=2	BAZ2A			LMSVADTLG	Probable E3 ubiquitin-protein ligase IRF2BPL OS=Mus musculus OX=10090 GN=Irf2bpl PE=1 SV=1	IRF2BPL
YENAVDAARL	WASH complex subunit 4 OS=Mus musculus OX=10090 GN=Washc4 PE=1 SV=2	WASHC4			YNEATGGKYVP	Tubulin beta-5 chain OS=Mus musculus OX=10090 GN=Tubb5 PE=1 SV=1	TUBB5			MEDAHTAVI	Protein phosphatase 1A OS=Mus musculus OX=10090 GN=Ppm1a PE=1 SV=1	PPM1A
YENLLGRE	Apical junction component 1 homolog OS=Mus musculus OX=10090 GN=Ajm1 PE=1 SV=1	AJM1			YNIVGLRSN	Methylcrotonoyl-CoA carboxylase subunit alpha, mitochondrial OS=Mus musculus OX=10090 GN=Mccc1 PE=1 SV=2	MCCC1			MEEKSPPQS	Inactive dual specificity phosphatase 27 OS=Mus musculus OX=10090 GN=Dusp27 PE=1 SV=1	DUSP27
YHTHHMGSLR	Uroplakin-3b-like protein 1 OS=Mus musculus OX=10090 GN=Upk3bl1 PE=2 SV=1	UPK3BL1			YQVFSAVSKK	N-myc-interactor OS=Mus musculus OX=10090 GN=Nmi PE=1 SV=1	NMI			MKADLSQHI	Nesprin-2 OS=Mus musculus OX=10090 GN=Syne2 PE=1 SV=2	SYNE2
					YSSSPGGAYVTR	Vimentin OS=Mus musculus OX=10090 GN=Vim PE=1 SV=3	VIM			MLTGESVPQ	Manganese-transporting ATPase 13A1 OS=Mus musculus OX=10090 GN=Atp13a1 PE=1 SV=2	ATP13A1
					YVTTSTRTY	Vimentin OS=Mus musculus OX=10090 GN=Vim PE=1 SV=3	VIM			MPVDGTEVT	Integrin alpha-2 OS=Mus musculus OX=10090 GN=Itga2 PE=1 SV=2	ITGA2
										PEAPRNFYP	Collagen and calcium-binding EGF domain-containing protein 1 OS=Mus musculus OX=10090 GN=Ccbe1 PE=2 SV=2	CCBE1
										PLPITPIGM	Forkhead box protein N3 OS=Mus musculus OX=10090 GN=Foxn3 PE=1 SV=1	FOXN3
										PLSGDQEIT	Sphingosine kinase 2 OS=Mus musculus OX=10090 GN=Sphk2 PE=1 SV=2	SPHK2
										PSVTPMTIV	Kinesin-like protein KIF9 OS=Mus musculus OX=10090 GN=Kif9 PE=1 SV=2	KIF9
										PTKKAAVAV	Zinc finger CCCH domain-containing protein 11A OS=Mus musculus OX=10090 GN=Zc3h11a PE=1 SV=1	ZC3H11A
										PVSQSWAEI	Tyrosine-protein kinase Fes/Fps OS=Mus musculus OX=10090 GN=Fes PE=1 SV=2	FES
										QAVPQPAVI	POU domain, class 6, transcription factor 1 OS=Mus musculus OX=10090 GN=Pou6f1 PE=1 SV=1	POU6F1
										QFPRREPSM	Formin-2 OS=Mus musculus OX=10090 GN=Fmn2 PE=1 SV=2	FMN2
										QGPKTIDQI	Eukaryotic translation initiation factor 4 gamma 1 OS=Mus musculus OX=10090 GN=Eif4g1 PE=1 SV=1	EIF4G1
										QGYDVSIPV	Exostosin-2 OS=Mus musculus OX=10090 GN=Ext2 PE=1 SV=2	EXT2
										QHSVQVDQL	NF-kappa-B essential modulator OS=Mus musculus OX=10090 GN=Ikbkg PE=1 SV=2	IKBKG
										QKSKDKMAT	PHD finger protein 10 OS=Mus musculus OX=10090 GN=Phf10 PE=1 SV=4	PHF10
										QQIQAKDTI	Spectrin alpha chain, erythrocytic 1 OS=Mus musculus OX=10090 GN=Spta1 PE=1 SV=3	SPTA1
										QSIADVHPI	Phosphorylase b kinase regulatory subunit alpha, liver isoform OS=Mus musculus OX=10090 GN=Phka2 PE=1 SV=1	PHKA2
										QSVANGVEI	AP-1 complex subunit mu-2 OS=Mus musculus OX=10090 GN=Ap1m2 PE=1 SV=3	AP1M2
										RARSDDLTI	Gap junction alpha-8 protein OS=Mus musculus OX=10090 GN=Gja8 PE=1 SV=2	GJA8
										RDPGNLGTI	rRNA methyltransferase 3, mitochondrial OS=Mus musculus OX=10090 GN=Mrm3 PE=2 SV=1	MRM3
										RISGPNPVV	B-cell CLL/lymphoma 9 protein OS=Mus musculus OX=10090 GN=Bcl9 PE=1 SV=3	BCL9
										RKVESMSCM	Protocadherin-20 OS=Mus musculus OX=10090 GN=Pcdh20 PE=2 SV=3	PCDH20
										RMVASMSKR	Kelch-like protein 20 OS=Mus musculus OX=10090 GN=Klhl20 PE=2 SV=2	KLHL20
										RNIRNIIRF	Protein SERAC1 OS=Mus musculus OX=10090 GN=Serac1 PE=2 SV=1	SERAC1
										SAILGHSLP	(blank)	?
										SAPENAVRM	Protein C10 OS=Mus musculus OX=10090 GN=Grcc10 PE=1 SV=1	GRCC10
										SATTALMTT	CD44 antigen OS=Mus musculus OX=10090 GN=Cd44 PE=1 SV=3	CD44
										SAVAVGLRQ	Trifunctional enzyme subunit alpha, mitochondrial OS=Mus musculus OX=10090 GN=Hadha PE=1 SV=1	HADHA
										SAVENKQQI	Serine/threonine-protein kinase PLK2 OS=Mus musculus OX=10090 GN=Plk2 PE=1 SV=1	PLK2
										SGIINPNVT	Adenylosuccinate synthetase isozyme 2 OS=Mus musculus OX=10090 GN=Adss2 PE=1 SV=2	ADSS2
										SGMNPIQTM	T-complex protein 1 subunit epsilon OS=Mus musculus OX=10090 GN=Cct5 PE=1 SV=1	CCT5
										SHEGTFEAI	Collagen alpha-2(VI) chain OS=Mus musculus OX=10090 GN=Col6a2 PE=1 SV=3	COL6A2
										SIIGPQQHF	Dual specificity protein phosphatase CDC14A OS=Mus musculus OX=10090 GN=Cdc14a PE=1 SV=2	CDC14A
										SIPAGLQNP	(blank)	?
										SLAADFSIT	Probable phospholipid-transporting ATPase IIA OS=Mus musculus OX=10090 GN=Atp9a PE=1 SV=3	ATP9A
										SNIIQGSQI	Toll-like receptor 5 OS=Mus musculus OX=10090 GN=Tlr5 PE=1 SV=1	TLR5
										SQAEQSSLI	WD repeat and coiled-coil-containing protein OS=Mus musculus OX=10090 GN=Wdcp PE=2 SV=2	WDCP
										SQIVSCEVR	Cysteine-rich secretory protein LCCL domain-containing 1 OS=Mus musculus OX=10090 GN=Crispld1 PE=2 SV=1	CRISPLD1
										SSDMGYPPQ	Signal transducer and transcription activator 6 OS=Mus musculus OX=10090 GN=Stat6 PE=1 SV=2	STAT6
										SSIPNYTYI	Bcl-2/adenovirus E1B 19 kDa-interacting protein 2-like protein OS=Mus musculus OX=10090 GN=Bnipl PE=2 SV=1	BNIPL
										SSIVAKMDN	(blank)	?
										SSPLASVAV	Cytochrome b-c1 complex subunit 1, mitochondrial OS=Mus musculus OX=10090 GN=Uqcrc1 PE=1 SV=2	UQCRC1
										SSTDMLQTI	Ras and Rab interactor 2 OS=Mus musculus OX=10090 GN=Rin2 PE=1 SV=3	RIN2
										SSVARDTIQ	TOG array regulator of axonemal microtubules protein 2 OS=Mus musculus OX=10090 GN=Togaram2 PE=2 SV=1	TOGARAM2
										SVPTAARTQ	Host cell factor 1 OS=Mus musculus OX=10090 GN=Hcfc1 PE=1 SV=2	HCFC1
										TAPVALREG	Desmoglein-2 OS=Mus musculus OX=10090 GN=Dsg2 PE=1 SV=3	DSG2
										TGFSGRGLQ	FAD-dependent oxidoreductase domain-containing protein 1 OS=Mus musculus OX=10090 GN=Foxred1 PE=1 SV=1	FOXRED1
										TGVIYQIEG	Soluble calcium-activated nucleotidase 1 OS=Mus musculus OX=10090 GN=Cant1 PE=2 SV=1	CANT1
										TLTGQTVAI	Centrosomal protein of 89 kDa OS=Mus musculus OX=10090 GN=Cep89 PE=1 SV=1	CEP89
										TMLEKLSDT	Hermansky-Pudlak syndrome 1 protein homolog OS=Mus musculus OX=10090 GN=Hps1 PE=2 SV=2	HPS1
										TQEIQVTSI	Rab-like protein 6 OS=Mus musculus OX=10090 GN=Rabl6 PE=1 SV=2	RABL6
										TSPISSHPV	Regulating synaptic membrane exocytosis protein 1 OS=Mus musculus OX=10090 GN=Rims1 PE=1 SV=2	RIMS1
										TSVSQNVVI	Transcription initiation factor TFIID subunit 11 OS=Mus musculus OX=10090 GN=Taf11 PE=2 SV=1	TAF11
										TTSQASREI	Caskin-2 OS=Mus musculus OX=10090 GN=Caskin2 PE=1 SV=3	CASKIN2
										TYKHTGGEI	FRAS1-related extracellular matrix protein 1 OS=Mus musculus OX=10090 GN=Frem1 PE=1 SV=1	FREM1
										VAICCIVMA	(blank)	?
										VAIKCVAKK	Serine/threonine-protein kinase ULK3 OS=Mus musculus OX=10090 GN=Ulk3 PE=2 SV=1	ULK3
										VAISLSEYP	Pleckstrin homology-like domain family B member 1 OS=Mus musculus OX=10090 GN=Phldb1 PE=1 SV=1	PHLDB1
										VANLSEQSL	Protein phosphatase 1 regulatory subunit 7 OS=Mus musculus OX=10090 GN=Ppp1r7 PE=1 SV=2	PPP1R7
										VAPEDPPSI	Homeobox protein Nkx-3.1 OS=Mus musculus OX=10090 GN=Nkx3-1 PE=1 SV=1	NKX3-1
										VAPPTHVES	E3 ubiquitin-protein ligase ZNRF3 OS=Mus musculus OX=10090 GN=Znrf3 PE=1 SV=1	ZNRF3
										VAPSYSQSA	Lamin tail domain-containing protein 2 OS=Mus musculus OX=10090 GN=Lmntd2 PE=2 SV=1	LMNTD2
										VAQEIQEEI	Amyloid-like protein 2 OS=Mus musculus OX=10090 GN=Aplp2 PE=1 SV=4	APLP2
										VAVEQLEKG	Nitric oxide synthase, endothelial OS=Mus musculus OX=10090 GN=Nos3 PE=1 SV=4	NOS3
										VAVTHEAIS	Protein phosphatase 1F OS=Mus musculus OX=10090 GN=Ppm1f PE=1 SV=1	PPM1F
										VAVVNKVDI	NPC intracellular cholesterol transporter 1 OS=Mus musculus OX=10090 GN=Npc1 PE=1 SV=2	NPC1
										VEEGAETPV	Carbonyl reductase [NADPH] 3 OS=Mus musculus OX=10090 GN=Cbr3 PE=1 SV=1	CBR3
										VEVPEDVTI	Cadherin-20 OS=Mus musculus OX=10090 GN=Cdh20 PE=2 SV=1	CDH20
										VFNPKEGII	Hydrocephalus-inducing protein OS=Mus musculus OX=10090 GN=Hydin PE=1 SV=2	HYDIN
										VFVAVMEFI	Glutamate receptor ionotropic, kainate 5 OS=Mus musculus OX=10090 GN=Grik5 PE=2 SV=2	GRIK5
										VFYEREVQM	V-type proton ATPase subunit d 2 OS=Mus musculus OX=10090 GN=Atp6v0d2 PE=2 SV=2	ATP6V0D2
										VGGISQQLQ	Tripartite motif-containing protein 3 OS=Mus musculus OX=10090 GN=Trim3 PE=1 SV=1	TRIM3
										VGGQVYVTR	BTB/POZ domain-containing protein KCTD12 OS=Mus musculus OX=10090 GN=Kctd12 PE=1 SV=1	KCTD12
										VGGVDRLTD	Tubulin polymerization-promoting protein family member 2 OS=Mus musculus OX=10090 GN=Tppp2 PE=2 SV=1	TPPP2
										VGIGGTRFQ	Dedicator of cytokinesis protein 9 OS=Mus musculus OX=10090 GN=Dock9 PE=1 SV=2	DOCK9
										VGKIWIPDT	Gamma-aminobutyric acid receptor subunit gamma-1 OS=Mus musculus OX=10090 GN=Gabrg1 PE=2 SV=2;Gamma-aminobutyric acid receptor subunit gamma-2 OS=Mus musculus OX=10090 GN=Gabrg2 PE=1 SV=3	GABRG1
										VGNAAWAHI	NADPH-dependent 3-keto-steroid reductase Hsd3b5 OS=Mus musculus OX=10090 GN=Hsd3b5 PE=1 SV=4	HSD3B5
										VGPEHGTEI	Interferon-induced very large GTPase 1 OS=Mus musculus OX=10090 GN=Gvin1 PE=1 SV=1	GVIN1
										VIEVTSFVS	3-hydroxy-3-methylglutaryl-CoA lyase, cytoplasmic OS=Mus musculus OX=10090 GN=Hmgcll1 PE=2 SV=1	HMGCLL1
										VIPTFDMAV	DNA replication licensing factor MCM4 OS=Mus musculus OX=10090 GN=Mcm4 PE=1 SV=1	MCM4
										VISAPDQLM	Sodium-coupled monocarboxylate transporter 2 OS=Mus musculus OX=10090 GN=Slc5a12 PE=1 SV=1	SLC5A12
										VISQPYELG	(blank)	?
										VITRNGQAR	(blank)	?
										VIVDMKSTS	Potassium voltage-gated channel subfamily B member 2 OS=Mus musculus OX=10090 GN=Kcnb2 PE=1 SV=2	KCNB2
										VIVTTVIIV	Acyl-CoA wax alcohol acyltransferase 2 OS=Mus musculus OX=10090 GN=Awat2 PE=1 SV=1	AWAT2
										VMDQLSSSI	Protein furry homolog OS=Mus musculus OX=10090 GN=Fry PE=1 SV=1	FRY
										VPAFNTGTI	AP-1 complex subunit gamma-1 OS=Mus musculus OX=10090 GN=Ap1g1 PE=1 SV=3	AP1G1
										VRHNPTETI	Plasminogen activator inhibitor 1 OS=Mus musculus OX=10090 GN=Serpine1 PE=1 SV=1	SERPINE1
										VRVSNQVAV	N-alpha-acetyltransferase 20 OS=Mus musculus OX=10090 GN=Naa20 PE=1 SV=1	NAA20
										VSLYLHDNT	ATP synthase subunit a OS=Mus musculus OX=10090 GN=Mtatp6 PE=1 SV=1	MTATP6
										VSPTGTHTL	Progranulin OS=Mus musculus OX=10090 GN=Grn PE=1 SV=2	GRN
										VSPTTVAHT	Olfactomedin-like protein 2B OS=Mus musculus OX=10090 GN=Olfml2b PE=1 SV=2	OLFML2B
										VSSTPSNER	Synemin OS=Mus musculus OX=10090 GN=Synm PE=1 SV=2	SYNM
										VTDVMLCTI	Kallikrein 1-related peptidase b16 OS=Mus musculus OX=10090 GN=Klk1b16 PE=1 SV=2	KLK1B16
										YEPDSVVMA	IST1 homolog OS=Mus musculus OX=10090 GN=Ist1 PE=1 SV=1	IST1
										YIEGLSAES	Protein polybromo-1 OS=Mus musculus OX=10090 GN=Pbrm1 PE=1 SV=4	PBRM1
										YNIVGLRSN	Methylcrotonoyl-CoA carboxylase subunit alpha, mitochondrial OS=Mus musculus OX=10090 GN=Mccc1 PE=1 SV=2	MCCC1
										AAPRPPPKPM	40S ribosomal protein S26 OS=Mus musculus OX=10090 GN=Rps26 PE=1 SV=3	RPS26
										AAVNVICELA	AP-3 complex subunit delta-1 OS=Mus musculus OX=10090 GN=Ap3d1 PE=1 SV=1	AP3D1
										AIFSVGLTAI	ATP-binding cassette sub-family B member 7, mitochondrial OS=Mus musculus OX=10090 GN=Abcb7 PE=1 SV=3	ABCB7
										ALQGEAEELL	Helicase POLQ-like OS=Mus musculus OX=10090 GN=Helq PE=1 SV=2	HELQ
										ASFPTSTEPQ	Methylcytosine dioxygenase TET3 OS=Mus musculus OX=10090 GN=Tet3 PE=1 SV=4	TET3
										ASVQPATASK	Protein piccolo OS=Mus musculus OX=10090 GN=Pclo PE=1 SV=4	PCLO
										CSLQVVPEEI	Protein scribble homolog OS=Mus musculus OX=10090 GN=Scrib PE=1 SV=2	SCRIB
										DEEDLNTIAE	Ubiquitin carboxyl-terminal hydrolase 43 OS=Mus musculus OX=10090 GN=Usp43 PE=1 SV=2	USP43
										DVMEVILKSG	L-2-hydroxyglutarate dehydrogenase, mitochondrial OS=Mus musculus OX=10090 GN=L2hgdh PE=1 SV=1	L2HGDH
										ECCRRAAPGT	ADAMTS-like protein 1 OS=Mus musculus OX=10090 GN=Adamtsl1 PE=2 SV=2	ADAMTSL1
										EIQAPPGVPV	Phospholipid scramblase 1 OS=Mus musculus OX=10090 GN=Plscr1 PE=1 SV=1	PLSCR1
										EKSSPVPETI	Protein ELFN1 OS=Mus musculus OX=10090 GN=Elfn1 PE=2 SV=1	ELFN1
										ENGLSAAFTI	A disintegrin and metalloproteinase with thrombospondin motifs 20 OS=Mus musculus OX=10090 GN=Adamts20 PE=2 SV=2	ADAMTS20
										EPSAVSEPIQ	Uncharacterized protein C1orf141 homolog OS=Mus musculus OX=10090 PE=2 SV=1	?
										FAPVNVTTEV	Elongation factor 1-alpha 1 OS=Mus musculus OX=10090 GN=Eef1a1 PE=1 SV=3	EEF1A1
										FGIIGATSAP	Sodium-coupled neutral amino acid transporter 3 OS=Mus musculus OX=10090 GN=Slc38a3 PE=1 SV=1	SLC38A3
										GEGPVERPGA	Telomerase protein component 1 OS=Mus musculus OX=10090 GN=Tep1 PE=1 SV=1	TEP1
										GGIGTVPVGR	Elongation factor 1-alpha 1 OS=Mus musculus OX=10090 GN=Eef1a1 PE=1 SV=3;Elongation factor 1-alpha 2 OS=Mus musculus OX=10090 GN=Eef1a2 PE=1 SV=1	EEF1A1
										GKGRSGEISI	Neuropilin-2 OS=Mus musculus OX=10090 GN=Nrp2 PE=1 SV=2	NRP2
										GQTVQVQGVI	cAMP-responsive element modulator OS=Mus musculus OX=10090 GN=Crem PE=1 SV=2	CREM
										GSPTGSINLS	Sorting nexin-13 OS=Mus musculus OX=10090 GN=Snx13 PE=2 SV=1	SNX13
										GTPESTLSGN	SH3 domain-containing protein 21 OS=Mus musculus OX=10090 GN=Sh3d21 PE=1 SV=1	SH3D21
										GTPSGPALQP	Zinc finger and BTB domain-containing protein 22 OS=Mus musculus OX=10090 GN=Zbtb22 PE=2 SV=1	ZBTB22
										IHSVDQKDVT	Alpha-protein kinase 1 OS=Mus musculus OX=10090 GN=Alpk1 PE=2 SV=2	ALPK1
										ISGVFEVPCL	Pleckstrin homology domain-containing family G member 2 OS=Mus musculus OX=10090 GN=Plekhg2 PE=2 SV=2	PLEKHG2
										KADPAFGLES	SWI/SNF complex subunit SMARCC2 OS=Mus musculus OX=10090 GN=Smarcc2 PE=1 SV=2	SMARCC2
										KAPRGDVTAE	MARCKS-related protein OS=Mus musculus OX=10090 GN=Marcksl1 PE=1 SV=2	MARCKSL1
										KAQSIAYEVV	Small conductance calcium-activated potassium channel protein 1 OS=Mus musculus OX=10090 GN=Kcnn1 PE=1 SV=2	KCNN1
										KDIDGHMVCL	Phospholipid hydroperoxide glutathione peroxidase OS=Mus musculus OX=10090 GN=Gpx4 PE=1 SV=4	GPX4
										KQVETGVAKM	Bone morphogenetic protein receptor type-2 OS=Mus musculus OX=10090 GN=Bmpr2 PE=1 SV=1	BMPR2
										LCPNSTGAEI	(blank)	?
										NRLCAATATI	D-dopachrome decarboxylase OS=Mus musculus OX=10090 GN=Ddt PE=1 SV=3	DDT
										NSAYGDTIVM	CD166 antigen OS=Mus musculus OX=10090 GN=Alcam PE=1 SV=3	ALCAM
										PAAAVVSAVI	Transcription factor Maf OS=Mus musculus OX=10090 GN=Maf PE=1 SV=2	MAF
										PMMVTKQENI	Cadherin-13 OS=Mus musculus OX=10090 GN=Cdh13 PE=1 SV=2	CDH13
										PTGVGKTAAV	ATPase family AAA domain-containing protein 5 OS=Mus musculus OX=10090 GN=Atad5 PE=1 SV=1	ATAD5
										QAALPEEICQ	HAUS augmin-like complex subunit 5 OS=Mus musculus OX=10090 GN=Haus5 PE=1 SV=1	HAUS5
										QAVQMSSPNA	Galactoside 2-alpha-L-fucosyltransferase 2 OS=Mus musculus OX=10090 GN=Fut2 PE=1 SV=1	FUT2
										QPPPPPPQGP	POU domain, class 3, transcription factor 3 OS=Mus musculus OX=10090 GN=Pou3f3 PE=2 SV=2	POU3F3
										QSIVGCVIDS	Inward rectifier potassium channel 4 OS=Mus musculus OX=10090 GN=Kcnj4 PE=1 SV=1	KCNJ4
										QTVEQGSWVG	Calcium-activated chloride channel regulator 1 OS=Mus musculus OX=10090 GN=Clca1 PE=1 SV=2	CLCA1
										RVEGGGTSVI	Syndecan-1 OS=Mus musculus OX=10090 GN=Sdc1 PE=1 SV=1	SDC1
										SAPHQIVAVG	Putative ATP-dependent RNA helicase TDRD12 OS=Mus musculus OX=10090 GN=Tdrd12 PE=1 SV=2	TDRD12
										SGIILQSGPD	Innate immunity activator protein OS=Mus musculus OX=10090 GN=Inava PE=2 SV=1	INAVA
										SGRIGADEEI	Peptidyl-prolyl cis-trans isomerase-like 4 OS=Mus musculus OX=10090 GN=Ppil4 PE=1 SV=2	PPIL4
										SSPAHHFGPQ	Protein PAT1 homolog 2 OS=Mus musculus OX=10090 GN=Patl2 PE=2 SV=1	PATL2
										SSPDAQTTEA	Collagen alpha-1(XVIII) chain OS=Mus musculus OX=10090 GN=Col18a1 PE=1 SV=4	COL18A1
										SSRGQKCGPQ	Putative uncharacterized Ig-region protein OS=Mus musculus OX=10090 PE=4 SV=1	?
										SSTTPPIEIS	Vasculin-like protein 1 OS=Mus musculus OX=10090 GN=Gpbp1l1 PE=1 SV=1	GPBP1L1
										STRVTAEVTT	Uncharacterized protein C11orf24 homolog OS=Mus musculus OX=10090 PE=2 SV=1	?
										SVIIGGKPYV	Kinesin heavy chain isoform 5A OS=Mus musculus OX=10090 GN=Kif5a PE=1 SV=3	KIF5A
										SVSFNVGCKK	Short transient receptor potential channel 5 OS=Mus musculus OX=10090 GN=Trpc5 PE=1 SV=2	TRPC5
										TIGHGGSTKV	Sperm motility kinase 2A OS=Mus musculus OX=10090 GN=Smok2a PE=2 SV=1	SMOK2A
										TSIIVSMVSS	Sodium-dependent phosphate transport protein 2A OS=Mus musculus OX=10090 GN=Slc34a1 PE=1 SV=2	SLC34A1
										TVAAGQHLLP	Lysine-specific histone demethylase 1B OS=Mus musculus OX=10090 GN=Kdm1b PE=1 SV=1	KDM1B
										TVPSFTAGSI	Olfactory receptor 478 OS=Mus musculus OX=10090 GN=Olfr478 PE=3 SV=1	OLFR478
										TVVAVGSGGK	10 kDa heat shock protein, mitochondrial OS=Mus musculus OX=10090 GN=Hspe1 PE=1 SV=2	HSPE1
										VAVVSSLVNG	Magnesium transporter NIPA1 OS=Mus musculus OX=10090 GN=Nipa1 PE=1 SV=1	NIPA1
										VGASSFREAM	Alpha-enolase OS=Mus musculus OX=10090 GN=Eno1 PE=1 SV=3	ENO1
										VGPSLLTSAS	Homeodomain-interacting protein kinase 1 OS=Mus musculus OX=10090 GN=Hipk1 PE=1 SV=2	HIPK1
										VIDMNGIEVK	Breakpoint cluster region protein OS=Mus musculus OX=10090 GN=Bcr PE=1 SV=3	BCR
										VIKQPMDLSS	ATPase family AAA domain-containing protein 2 OS=Mus musculus OX=10090 GN=Atad2 PE=1 SV=1	ATAD2
										VISNAVDHIK	N-alpha-acetyltransferase 25, NatB auxiliary subunit OS=Mus musculus OX=10090 GN=Naa25 PE=1 SV=1	NAA25
										VMTSELAGVI	Guanine nucleotide-binding protein G(i) subunit alpha OS=Mus musculus OX=10090 GN=Gnai3 PE=1 SV=3	GNAI3
										VNCAGIAVAI	3-hydroxyacyl-CoA dehydrogenase type-2 OS=Mus musculus OX=10090 GN=Hsd17b10 PE=1 SV=4	HSD17B10
										VRDAASGEEI	Thimet oligopeptidase OS=Mus musculus OX=10090 GN=Thop1 PE=1 SV=1	THOP1
										VSHGTQEQDT	Protein PAT1 homolog 2 OS=Mus musculus OX=10090 GN=Patl2 PE=2 SV=1	PATL2
										YDESGPSIVH	Actin, cytoplasmic 1 OS=Mus musculus OX=10090 GN=Actb PE=1 SV=1	ACTB
										YGISNEKPEV	RNA polymerase II-associated factor 1 homolog OS=Mus musculus OX=10090 GN=Paf1 PE=1 SV=1	PAF1
										YISPLGGGPG	Epsin-1 OS=Mus musculus OX=10090 GN=Epn1 PE=1 SV=3	EPN1
										AAPAALGGSGE	RAB11-binding protein RELCH OS=Mus musculus OX=10090 GN=Relch PE=1 SV=1	RELCH
										AGGPMPPQGFI	G-protein coupled receptor 151 protein OS=Mus musculus OX=10090 GN=Gpr151 PE=1 SV=1	GPR151
										AGIIPAEAVSM	Ataxin-2 OS=Mus musculus OX=10090 GN=Atxn2 PE=1 SV=1	ATXN2
										ALSPGDHEVTI	Leukemia inhibitory factor receptor OS=Mus musculus OX=10090 GN=Lifr PE=1 SV=1	LIFR
										AVAPMGALCGL	MMS19 nucleotide excision repair protein homolog OS=Mus musculus OX=10090 GN=Mms19 PE=1 SV=1	MMS19
										AYQIAIDAAAG	Zinc finger SWIM domain-containing protein 5 OS=Mus musculus OX=10090 GN=Zswim5 PE=2 SV=2	ZSWIM5
										FAPVNVTTEVK	Elongation factor 1-alpha 1 OS=Mus musculus OX=10090 GN=Eef1a1 PE=1 SV=3	EEF1A1
										GVSSMAVASVM	Calmodulin-binding transcription activator 1 OS=Mus musculus OX=10090 GN=Camta1 PE=2 SV=1	CAMTA1
										KIGQGASGTVF	Serine/threonine-protein kinase PAK 2 OS=Mus musculus OX=10090 GN=Pak2 PE=1 SV=1	PAK2
										LTTDTIKILPP	Oviduct-specific glycoprotein OS=Mus musculus OX=10090 GN=Ovgp1 PE=2 SV=1	OVGP1
										PEPAKSAPAPK	Histone H2B type 1-F/J/L OS=Mus musculus OX=10090 GN=H2bc7 PE=1 SV=2	H2BC7
										PIACGATLEEI	TBC1 domain family member 8 OS=Mus musculus OX=10090 GN=Tbc1d8 PE=1 SV=2	TBC1D8
										SAISMAAATST	Interleukin-1 receptor accessory protein-like 1 OS=Mus musculus OX=10090 GN=Il1rapl1 PE=1 SV=1	IL1RAPL1
										SAPTAPQPSGD	Phostensin OS=Mus musculus OX=10090 GN=Ppp1r18 PE=1 SV=1	PPP1R18
										SAVGASPGDKK	DIS3-like exonuclease 2 OS=Mus musculus OX=10090 GN=Dis3l2 PE=1 SV=1	DIS3L2
										SAVTSTGNCTI	Multiple epidermal growth factor-like domains protein 9 OS=Mus musculus OX=10090 GN=Megf9 PE=2 SV=1	MEGF9
										SKAAHSRTSAP	Chromodomain-helicase-DNA-binding protein 9 OS=Mus musculus OX=10090 GN=Chd9 PE=1 SV=2	CHD9
										TDAQSGLAIAA	(blank)	?
										TEKESTEKDEL	Endoplasmin OS=Mus musculus OX=10090 GN=Hsp90b1 PE=1 SV=2	HSP90B1
										VAGGAGLAVPG	Polycystin-2 OS=Mus musculus OX=10090 GN=Pkd2 PE=1 SV=2	PKD2
										VISAQVAVVSE	Fanconi anemia group A protein homolog OS=Mus musculus OX=10090 GN=Fanca PE=2 SV=2	FANCA
										VSDCQSAVPGT	Protein LEG1 homolog OS=Mus musculus OX=10090 GN=Leg1 PE=2 SV=2	LEG1
										VTIPVPAGVED	DnaJ homolog subfamily A member 3, mitochondrial OS=Mus musculus OX=10090 GN=Dnaja3 PE=1 SV=1	DNAJA3
										YGYSNRVVDLM	Glyceraldehyde-3-phosphate dehydrogenase OS=Mus musculus OX=10090 GN=Gapdh PE=1 SV=2	GAPDH
										IAEQENRLSEAR	A-kinase anchor protein 9 OS=Mus musculus OX=10090 GN=Akap9 PE=1 SV=2	AKAP9
										IDSSSDAAADPF	Type-1 angiotensin II receptor-associated protein OS=Mus musculus OX=10090 GN=Agtrap PE=1 SV=2	AGTRAP
										KVGAAGGARGVI	Serine/threonine-protein kinase pim-3 OS=Mus musculus OX=10090 GN=Pim3 PE=1 SV=1	PIM3
										MASATAAAAPGE	Myb-related transcription factor, partner of profilin OS=Mus musculus OX=10090 GN=Mypop PE=1 SV=1	MYPOP
										NFASHAIVEDNV	GPI ethanolamine phosphate transferase 3 OS=Mus musculus OX=10090 GN=Pigo PE=1 SV=2	PIGO
										PEAPPPALPAGA	Ryanodine receptor 1 OS=Mus musculus OX=10090 GN=Ryr1 PE=1 SV=1	RYR1
										PVCKPATCGPPA	Sushi, von Willebrand factor type A, EGF and pentraxin domain-containing protein 1 OS=Mus musculus OX=10090 GN=Svep1 PE=1 SV=1	SVEP1
										QSDRGEGVEVVQ	Cytoplasmic phosphatidylinositol transfer protein 1 OS=Mus musculus OX=10090 GN=Pitpnc1 PE=1 SV=1	PITPNC1
